# Supplementary material
Source: publisher figshare collection journal article supplement (https://gsapubs.figshare.com/articles/dataset/_/14842740)
Supplement: Supplementary file 1 [file 1]

## Sheet: G48956
Qian, S., et al., 2021, First identification of a Cathaysian continental fragment beneath the Gagua Ridge, Philippine Sea, and its tectonic implications: Geology, v. 49, https://doi.org/10.1130/G48956.1

## Sheet: Table DR1
Table DR1. Major and trace element, and Sr-Nd-Hf-Pb isotope composition of the GR lavas
Sample	D7-1-7	D7-1-16	D7-1-17	D7-1-18	D7-1-24	D7-1-27	D7-1-30	D7-1-42
Longitude	122° 55′ E	122° 55′ E	122° 55′ E	122° 55′ E	122° 55′ E	122° 55′ E	122° 55′ E	122° 55′ E
Latitude	22° 4′ N	22° 4′ N	22° 4′ N	22° 4′ N	22° 4′ N	22° 4′ N	22° 4′ N	22° 4′ N
XRF (wt%)
SiO2	53.43	54.06	53.7	55.15	55.47	54.32	54.07	54.16
TiO2	1.04	1.06	1.13	1.01	0.92	1.15	1.03	1.13
Al2O3	17.21	16.58	16.06	16.83	15.78	16.64	17.75	16.68
Fe2O3T	9.19	9.53	9.94	8.46	8.98	9.17	7.95	9.45
MnO	0.14	0.14	0.15	0.13	0.14	0.1	0.11	0.12
MgO	4.15	4.15	4.59	3.87	4.13	3.35	3.59	3.7
CaO	7.52	6.95	6.52	6.92	7.19	6.33	7.43	6.79
Na2O	3.12	3.33	3.24	3.41	3.23	3.54	3.28	2.95
K2O	1.13	1.48	1.28	1.78	1.72	2.19	1.63	1.26
P2O5	0.39	0.36	0.42	0.33	0.3	0.39	0.33	0.28
Cr2O3	0.01	0.02	0.01	0.01	0.01	0.01	0.01	<0.01
LOI	2.03	1.98	2.61	1.88	1.96	2.36	2.01	2.48
Total	99.36	99.64	99.65	99.78	99.83	99.55	99.19	99
ICP-MS (ppm)
Li	35.2997	26.8365	22.7967	25.7021	12.196	29.3341	22.7964	24.4385
B	15.4261	20.0692	18.3159	26.5358	34.2278	24.0596	20.0527	24.2341
Sc	22.4057	14.4918	15.1521	15.0358	17.8947	24.3407	10.0493	21.4612
V	287.773	284.607	286.854	267.508	277.333	293.269	246.614	270.125
Cr	41.9227	44.7381	66.4787	60.3568	64.4903	43.4253	47.4286	27.3593
Mn	1061.32	1070.82	1182.56	974.605	1111.57	821.412	846.644	944.346
Co	26.767	23.7555	24.6926	22.121	21.6828	21.7316	21.3888	21.1518
Ni	21.0046	24.1267	29.6635	25.2169	27.0969	22.2781	17.7446	14.9372
Cu	209.684	200.262	160.609	159.816	212.425	174.259	144.897	109.377
Zn	125.007	139.152	112.267	161.684	102.267	182.858	156.693	161.054
Ga	19.208	18.5036	18.1302	17.5063	17.4069	18.6786	18.6503	17.7546
As	26.7941	26.4521	27.0284	26.1936	27.7297	26.9016	26.4075	27.3437
Rb	9.38916	12.6033	12.8155	15.5298	29.5022	18.9762	8.63733	17.6351
Sr	506.517	455.833	468.52	425.518	401.269	432.79	531.829	502.16
Zr	199.897	218.489	173.482	207.729	193.216	234.179	198.951	206.663
Y	12.3437	11.6044	11.5495	16.9656	23.7924	10.0354	11.9264	10.2957
Nb	8.48983	7.71309	6.27714	6.94864	6.79934	8.23154	7.79536	7.87409
Mo	2.07866	1.7626	1.47126	1.47592	1.95714	1.5683	1.46361	1.71416
Cd	0.379105	0.44846	0.345918	0.376393	0.362463	0.429351	0.349085	0.363613
Cs	0.503918	0.67885	0.596087	0.555646	1.02711	0.64879	0.312324	0.756193
Ba	180.44	206.268	164.621	168.675	171.467	223.44	188.689	169.176
La	4.2135	4.28157	4.41948	9.16424	15.5493	3.72347	6.11235	5.85048
Ce	10.8195	10.8854	11.1058	24.336	39.027	9.01469	16.1807	14.1769
Pr	1.74457	1.70661	1.697	3.42592	5.26449	1.40332	2.3566	1.91007
Nd	9.17378	8.59709	8.40935	16.0429	23.9834	7.14646	11.4047	8.50811
Sm	2.66968	2.4048	2.38937	3.93381	5.63883	2.08935	2.98951	2.16366
Eu	1.34143	1.33706	1.22589	1.43299	1.5748	1.44785	1.41185	1.18496
Gd	2.73353	2.56863	2.53647	3.93964	5.59827	2.22439	3.00845	2.21879
Tb	0.431737	0.402271	0.397694	0.582562	0.811116	0.35106	0.448234	0.342275
Dy	2.45498	2.34909	2.34708	3.262	4.49143	2.01766	2.47131	2.01826
Ho	0.49896	0.478507	0.478467	0.646566	0.891709	0.412944	0.494438	0.409338
Er	1.42836	1.40123	1.4067	1.90609	2.63844	1.18362	1.41662	1.25201
Tm	0.203445	0.200383	0.20429	0.267105	0.371344	0.167916	0.200319	0.182942
Yb	1.36135	1.3518	1.36064	1.75028	2.49272	1.10011	1.31743	1.27418
Lu	0.207663	0.205922	0.204235	0.264718	0.37486	0.168094	0.195023	0.197297
Hf	5.25597	5.70797	4.67587	5.51906	5.0808	6.07818	5.24419	5.46626
Ta	0.60275	0.566723	0.450389	0.527743	0.500979	0.583897	0.580317	0.593869
U	0.209228	0.263736	0.259742	0.449633	0.756959	0.369518	0.321256	0.382559
Th	0.83379	0.658821	0.70026	1.20072	1.8374	0.510903	0.74979	1.37047
Pb	5.13271	5.7892	4.5344	6.34089	5.58489	5.32576	5.51638	6.61093
MC-ICP-MS
87Sr/86Sr	0.70333	0.703362	0.703387	0.703418	0.703574	0.70341	0.703297	0.703362
±2σ	4.55758e-06	3.86849e-06	4.06558e-06	3.39047e-06	3.65859e-06	3.84062e-06	3.72747e-06	3.93883e-06
143Nd/144Nd	0.513067	0.513059	0.512972	0.513012	0.512991	0.513059	0.513032	0.513016
±2σ	2.21645e-06	2.91418e-06	3.07783e-06	2.30855e-06	2.51365e-06	2.84235e-06	2.22656e-06	2.88315e-06
176Hf/177Hf	0.283141	0.283137	0.283122	0.283134	0.283148	0.283157	0.283116	0.283112
±2σ	4.48e-06	4.38e-06	5.06e-06	5.02e-06	5.52e-06	4.52e-06	3.46e-06	4.6e-06
206Pb/204Pb	18.3064	18.2914	18.305	18.3044	18.3303	18.2864	18.3241	18.2787
±2σ	0.00057	0.000496	0.000444	0.000506	0.000418	0.00063	0.00056	0.000588
207Pb/204Pb	15.4814	15.4761	15.4929	15.4814	15.4794	15.4809	15.4893	15.4783
±2σ	0.000416	0.000452	0.000404	0.00048	0.000386	0.000432	0.000524	0.000476
208Pb/204Pb	37.9976	37.9612	38.0183	38.0011	37.987	37.9793	38.0381	37.9843
±2σ	0.001248	0.001346	0.001116	0.001446	0.001208	0.001312	0.001668	0.001458

## Sheet: Table DR2
Table DR2. U-Pb dating results for zircons in the GR lavas
Spot	U-Th-Pb ratios									Ages (Ma)								Concordance*
	207Pb/206Pb	1sigma	207Pb/235U	1sigma	206Pb/238U	1sigma	208Pb/232Th	1sigma		207Pb/206Pb	1sigma	207Pb/235U	1sigma	206Pb/238U	1sigma	208Pb/232Th	1sigma
D7-1-18-1	0.06621	0.00137	1.26429	0.01851	0.1383	0.00188	0.04404	0.00051		813	42.72	829.8	8.3	835	10.66	871	9.84	0.993772
D7-1-18-2	0.06596	0.00139	1.18779	0.01806	0.13041	0.00178	0.03574	0.00044		805.1	43.6	794.9	8.38	790.2	10.17	709.8	8.56	1.00595
D7-1-18-3	0.08005	0.00213	0.41265	0.00897	0.03733	0.00054	0.01249	0.00017		1198.3	51.52	350.8	6.45	236.2	3.35	250.9	3.39	1.48518
D7-1-18-4	0.0859	0.00197	0.23955	0.0042	0.02019	0.00028	0.00123	2e-05		1136	43.78	218.1	3.44	128.9	1.77	24.8	0.33	1.69201
D7-1-18-5	0.22066	0.00569	0.67891	0.0137	0.02228	0.00034	0.00717	0.0001		2985.5	40.9	526.1	8.29	142	2.16	144.5	2.01	3.70493
D7-1-18-6	0.05828	0.00185	0.25454	0.00706	0.03162	0.00047	0.00801	0.00012		539.6	68.74	230.3	5.72	200.7	2.94	161.3	2.32	1.14748
D7-1-18-7	0.06368	0.00509	0.11059	0.00844	0.01257	0.0003	0.00245	8e-05		731	160.75	106.5	7.72	80.5	1.89	49.4	1.59	1.32298
D7-1-18-8	0.0536	0.00143	0.2753	0.0061	0.03716	0.00053	0.01166	0.00015		354.2	59.21	246.9	4.85	235.2	3.3	234.2	3.05	1.04974
d7-1-18-9	0.05552	0.00153	0.27697	0.0064	0.03609	0.00052	0.01044	0.00014		433	59.85	248.3	5.09	228.5	3.24	209.9	2.88	1.08665
D7-1-18-10	0.09354	0.00224	0.38917	0.0073	0.0301	0.00043	0.01252	0.00016		1498.8	44.58	333.8	5.34	191.2	2.69	251.5	3.25	1.74582
D7-1-18-11	0.11285	0.00226	1.71134	0.02384	0.10969	0.00151	0.14727	0.00178		1845.8	35.77	1012.8	8.93	670.9	8.75	2776.8	31.27	1.50961
D7-1-18-12	0.06444	0.00158	1.05468	0.02083	0.11838	0.0017	0.0314	0.0004		756	50.99	731.2	10.29	721.2	9.77	625	7.8	1.01387
D7-1-18-13	0.06458	0.00151	1.05887	0.01948	0.11857	0.00168	0.03092	0.00039		760.7	48.65	733.3	9.61	722.3	9.69	615.4	7.67	1.01523
D7-1-18-14	0.06835	0.00168	1.1415	0.02259	0.12078	0.00174	0.03642	0.00049		879	50.05	773.2	10.71	735	10	723	9.5	1.05197
D7-1-18-15	0.06212	0.00125	1.02794	0.01467	0.11965	0.00165	0.03307	0.00037		678.2	42.56	717.9	7.34	728.6	9.5	657.7	7.18	0.985314
D7-1-18-16	0.0511	0.00143	0.26273	0.00621	0.03717	0.00054	0.01118	0.00015		245.3	63.03	236.9	5	235.3	3.35	224.8	3.07	1.0068
D7-1-18-17	0.08953	0.0022	0.49038	0.00962	0.0396	0.00057	0.01414	0.00018		1415.5	46.18	405.2	6.55	250.3	3.55	283.9	3.66	1.61886
D7-1-18-18	0.05822	0.00123	0.83002	0.01303	0.10302	0.00144	0.02641	0.00033		537.5	46.23	613.6	7.23	632.1	8.42	527	6.54	0.970732
D7-1-18-19	0.06258	0.0016	0.6245	0.01315	0.0721	0.00105	0.01474	0.00022		694.1	53.63	492.7	8.22	448.8	6.3	295.7	4.38	1.09782
D7-1-18-20	0.06683	0.00233	0.10098	0.00313	0.01092	0.00017	0.00895	0.00015		832.6	70.89	97.7	2.89	70	1.09	180	3.03	1.39571
D7-1-18-21	0.1238	0.00416	0.1648	0.0048	0.00962	0.00016	0.0043	8e-05		2011.7	58.4	154.9	4.18	61.7	1.02	86.6	1.51	2.51053
D7-1-18-22	0.06417	0.00149	1.02056	0.01869	0.1149	0.00165	0.02905	0.0004		747.1	48.3	714.2	9.39	701.1	9.51	578.9	7.85	1.01868
D7-1-18-23	0.09467	0.00401	0.5382	0.02077	0.04107	0.00075	0.01565	0.00034		1521.5	77.84	437.2	13.71	259.4	4.64	313.9	6.77	1.68543
D7-1-18-24	0.07774	0.00208	0.37031	0.00826	0.03441	0.00051	0.00853	0.00012		1140.1	52.27	319.9	6.12	218.1	3.18	171.6	2.45	1.46676
D7-1-18-25	0.06782	0.00233	1.12065	0.03462	0.11935	0.00194	0.03204	0.00059		863	69.77	763.3	16.57	726.8	11.15	637.5	11.51	1.05022
D7-1-18-26	0.06439	0.00162	1.10206	0.02278	0.12362	0.00181	0.03631	0.00049		754.3	52.17	754.3	11	751.3	10.39	720.8	9.62	1.00399
D7-1-18-27	0.06828	0.00185	1.12865	0.0258	0.11937	0.00179	0.03524	0.00052		877	54.99	767.1	12.3	727	10.31	700	10.23	1.05516
D7-1-18-28	0.06006	0.00126	0.72408	0.01134	0.08703	0.00123	0.01529	0.00021		605.9	44.68	553.1	6.68	537.9	7.31	306.8	4.09	1.02826
D7-1-18-29	0.08088	0.00205	0.37855	0.00786	0.03378	0.0005	0.01138	0.00016		1218.5	48.96	326	5.79	214.2	3.11	228.7	3.15	1.52194
D7-1-18-30	0.07884	0.0018	1.41241	0.02536	0.12932	0.00188	0.04659	0.00064		1168	44.47	894.2	10.68	784	10.73	920.4	12.27	1.14056
D7-1-18-31	0.15327	0.00512	0.63518	0.01835	0.02991	0.00052	0.01361	0.00025		2382.8	55.82	499.3	11.4	190	3.28	273.1	4.92	2.62789
D7-1-18-32	0.05102	0.00141	0.26413	0.00621	0.03736	0.00055	0.01138	0.00016		241.7	62.28	238	4.99	236.5	3.43	228.7	3.16	1.00634
D7-1-18-33	0.20445	0.00586	1.2928	0.03074	0.04563	0.00077	0.03334	0.00055		2862.1	45.87	842.5	13.61	287.6	4.75	662.9	10.74	2.92942
D7-1-18-34	0.0532	0.00153	0.25418	0.0063	0.03448	0.00052	0.00947	0.00014		337.2	63.79	230	5.1	218.5	3.21	190.5	2.73	1.05263
D7-1-18-35	0.05798	0.00176	0.29058	0.0077	0.03616	0.00055	0.01003	0.00015		528.7	65.33	259	6.06	229	3.43	201.7	3.01	1.131
D7-1-18-36	0.05245	0.00117	0.28478	0.005	0.03918	0.00056	0.01135	0.00015		305	50.1	254.4	3.95	247.7	3.49	228.1	2.98	1.02705
D7-1-18-37	0.10628	0.00276	0.54774	0.01175	0.03718	0.00057	0.01408	0.0002		1736.6	46.74	443.5	7.71	235.3	3.52	282.7	4.02	1.88483
D7-1-24-26	0.0534321	0.00190638	0.156585	0.00516067	0.0212524	0.000250408	0.00506427	0.000149703		346.35	84.25	147.709	4.53174	135.566	1.58233	102.102	3.01058	1.08957
D7-1-24-64	0.0547924	0.00229912	0.284207	0.0111434	0.0375284	0.000450303	0.0123051	0.00025881		466.71	94.435	253.989	8.81241	237.495	2.80078	247.197	5.16755	1.06945
D7-1-24-27	0.0466052	0.00368825	0.278117	0.0232936	0.0425657	0.000595823	0.0131852	0.000366462		27.875	181.455	249.163	18.506	268.717	3.68696	264.76	7.31062	0.927232
D7-1-24-37	0.0548204	0.00217114	0.325609	0.0125667	0.0430058	0.00045479	0.0135993	0.000276281		405.605	88.88	286.208	9.62775	271.437	2.8147	273.019	5.50932	1.05442
D7-1-24-52	0.0574891	0.00324732	0.366009	0.028564	0.0454514	0.00262689	0.0234941	0.00114429		509.3	121.28	316.691	21.2333	286.535	16.1985	469.376	22.5977	1.10524
D7-1-24-24	0.0565502	0.00348236	0.402274	0.0242412	0.0517976	0.000816047	0.015638	0.000498618		472.265	137.018	343.296	17.5546	325.548	5.0046	313.633	9.923	1.05452
D7-1-24-105	0.0543965	0.00176874	0.547299	0.0174952	0.0723221	0.000804646	0.0230443	0.000515896		387.09	67.585	443.226	11.4848	450.131	4.84335	460.491	10.1925	0.984661
D7-1-24-48	0.0627831	0.00555668	0.638965	0.0534173	0.0755998	0.000801982	0.0299219	0.0045227		701.86	188.87	501.665	33.0952	469.805	4.81323	595.917	88.7579	1.06782
D7-1-24-83	0.0574358	0.0124289	0.729636	0.157473	0.0813263	0.00199285	0.0397531	0.0124995		509.3	414.77	556.34	92.445	504.034	11.8837	787.939	242.983	1.10377
D7-1-24-11	0.0523746	0.00385459	0.605493	0.0451915	0.0834711	0.000789413	0.0257086	0.000990195		301.91	168.498	480.714	28.5829	516.808	4.70512	513.061	19.5124	0.930159
D7-1-24-01	0.0553085	0.00560174	0.653404	0.0675023	0.0844396	0.00135396	0.0256357	0.0014682		433.38	223.115	510.572	41.4557	522.568	8.05349	511.625	28.9338	0.977044
D7-1-24-10	0.0530848	0.00634155	0.643226	0.0777414	0.0851479	0.00100087	0.0262226	0.00176938		331.54	274.04	504.301	48.0392	526.777	5.95253	523.187	34.8492	0.957333
D7-1-24-33	0.0567996	0.00500852	0.75867	0.0668625	0.0948052	0.00106915	0.0284691	0.00371481		483.375	228.675	573.243	38.6056	583.893	6.30324	567.385	73.0061	0.98176
D7-1-24-95	0.0536116	0.00365589	0.738659	0.0505127	0.0997896	0.00108647	0.0268959	0.00158821		353.76	153.683	561.623	29.5021	613.176	6.37696	536.444	31.2604	0.915925
D7-1-24-28	0.0638393	0.00188254	0.934145	0.0260322	0.106254	0.00126018	0.0346445	0.000840524		744.45	62.9575	669.813	13.6739	650.958	7.35179	688.387	16.42	1.02897
D7-1-24-71	0.0671549	0.00444988	1.13982	0.074843	0.121897	0.00125112	0.0398529	0.0014489		842.59	138.885	772.423	35.5183	741.474	7.20006	789.879	28.1632	1.04174
D7-1-24-20	0.0588793	0.00287433	1.19383	0.0629204	0.144388	0.00205892	0.0374131	0.00163247		561.145	105.54	797.732	29.1269	869.426	11.6075	742.4	31.8059	0.917539
D7-1-24-46	0.0486355	0.0163595	1.52026	0.432589	0.157569	0.00367315	0.0817902	0.0485964		131.57	644.36	938.583	174.286	943.255	20.4618	1589.03	907.977	0.995047
D7-1-24-22	0.0614038	0.0100062	1.47044	0.247578	0.166375	0.00220407	0.0423781	0.00438781		653.72	355.522	918.31	101.76	992.105	12.1934	838.904	85.0818	0.925618
D7-1-24-21	0.082796	0.00286449	1.92681	0.0595113	0.169585	0.0021773	0.0535695	0.00140259		1264.81	68.055	1090.43	20.6593	1009.82	12.013	1054.75	26.9081	1.25251
D7-1-24-38	0.0547596	0.014393	1.5207	0.348591	0.173055	0.00282196	0.0487132	0.00908467		466.71	436.68	938.761	140.42	1028.92	15.5177	961.373	175.092	0.453592
D7-1-24-16	0.0734664	0.00318007	2.3935	0.103162	0.234196	0.00234031	0.0673836	0.00177743		1027.78	92.7525	1240.66	30.8789	1356.45	12.2458	1318.05	33.6578	0.757693
D7-1-24-109	0.0762421	0.0194609	3.42658	0.759863	0.240863	0.0067371	0.0881551	0.0108056		1101.85	529.612	1510.51	174.303	1391.18	35.008	1707.6	200.711	0.792025
D7-1-24-80	0.0936888	0.0168759	3.11331	0.597792	0.258174	0.00373505	0.133042	0.0164587		1501.85	346.298	1435.98	147.57	1480.49	19.1537	2524.63	293.605	1.01443
D7-1-24-116	0.0687113	0.0271693	4.15112	0.871328	0.268768	0.00867543	0.109081	0.0176601		900	646.3	1664.43	171.759	1534.55	44.0863	2092.6	321.843	0.586492
D7-1-24-53	0.0775731	0.0206599	4.20153	0.975764	0.286136	0.00681303	0.0586732	0.0157515		1136.12	551.985	1674.32	190.481	1622.19	34.1597	1152.43	300.728	0.700359
D7-1-24-72	0.055923	0.0205397	4.74918	0.931157	0.297354	0.011049	0.0724325	0.0178556		450.045	657.055	1775.96	164.459	1678.17	54.9086	1413.43	336.527	0.268175
D7-1-24-23	0.11237	0.00320856	4.74657	0.139675	0.304587	0.00386821	0.0878639	0.00213434		1838.89	56.48	1775.5	24.7093	1714.01	19.1365	1702.19	39.6555	1.07286
D7-1-24-67	0.102823	0.0153188	5.55582	0.962842	0.30816	0.0104114	0.119458	0.0125918		1675.92	277.933	1909.28	149.133	1731.65	51.3142	2280.84	227.35	0.967821
D7-1-24-74	0.130657	0.00675614	5.52833	0.263027	0.309082	0.00419663	0.110291	0.00531236		2107.1	90.7425	1905.01	40.9303	1736.19	20.687	2114.65	96.7086	1.21363
D7-1-24-12	0.128619	0.0025788	5.60285	0.175449	0.311216	0.00693925	0.086436	0.00223501		2079.32	35.185	1916.54	27.0119	1746.69	34.1289	1675.65	41.5805	1.19043
D7-1-24-45	0.133091	0.00737824	5.57911	0.260063	0.314577	0.0042231	0.105751	0.00313241		2139.2	97.2275	1912.88	40.1578	1763.19	20.7311	2031.82	57.2579	1.21325
D7-1-24-42	0.133203	0.00759366	6.41451	0.336193	0.354486	0.00392924	0.116056	0.00496156		2140.43	98.9225	2034.26	46.0609	1955.98	18.7302	2219.32	89.8559	1.0943
D7-1-24-09	0.134947	0.00274466	6.79187	0.147052	0.362199	0.00401086	0.0963301	0.00181916		2164.81	35.495	2084.66	19.2151	1992.59	19.0113	1858.89	33.5385	1.08643
D7-1-24-02	0.166404	0.00417747	10.4436	0.264281	0.452622	0.00592668	0.129801	0.00303934		2521.91	43.055	2474.92	23.5098	2406.9	26.3334	2466.72	54.3741	1.04778
D7-1-24-04	0.158195	0.00406055	9.9285	0.232544	0.454419	0.00507251	0.125593	0.00255243		2436.72	43.5175	2428.16	21.669	2414.87	22.5206	2391.3	45.834	1.00905
D7-1-24-05	0.164859	0.00318818	9.99834	0.187891	0.436475	0.0032629	0.123539	0.00243768		2505.86	32.72	2434.63	17.4252	2334.84	14.697	2354.39	43.8534	1.07325
D7-1-24-06	0.164504	0.00358612	10.7954	0.223678	0.473589	0.00467857	0.130751	0.00235792		2502.78	36.73	2505.67	19.3301	2499.28	20.5115	2483.73	42.148	1.0014
D7-1-24-07	0.172093	0.00410388	11.0771	0.262168	0.464352	0.00550305	0.13803	0.00270151		2588.89	39.3525	2529.64	22.1088	2458.75	24.2621	2613.42	47.9808	1.05293
D7-1-24-08	0.168678	0.00490628	10.8988	0.286888	0.46836	0.00465815	0.14117	0.00331634		2546.29	48.7625	2514.54	24.5412	2476.36	20.4939	2669.11	58.7384	1.02824
D7-1-24-100	0.0776779	0.026207	9.13907	2.42135	0.400115	0.0199287	0.214515	0.100749		1138.89	716.788	2352.03	242.493	2169.57	91.7633	3928.14	1676.69	0.52494
D7-1-24-101	0.16198	0.00488824	10.4357	0.298557	0.464391	0.00490735	0.142583	0.00533038		2476.23	51.6975	2474.22	26.5624	2458.91	21.6435	2694.12	94.2941	1.00704
D7-1-24-102	0.154948	0.00555321	9.06532	0.333362	0.419167	0.00386219	0.127527	0.00300101		2401.54	60.795	2344.62	33.6671	2256.7	17.5859	2426	53.7965	1.06418
D7-1-24-104	0.161146	0.0103761	10.7822	0.829338	0.455238	0.00887671	0.140346	0.008111		2467.59	108.948	2504.54	71.492	2418.5	39.3437	2654.51	143.765	1.0203
D7-1-24-110	0.1313	0.0125483	7.3145	0.696935	0.387398	0.005278	0.127914	0.00912211		2116.66	167.438	2150.58	85.1237	2110.75	24.5502	2432.95	163.468	1.0028
D7-1-24-112	0.0982081	0.0206591	6.77157	1.06215	0.397361	0.00722506	0.143379	0.0161248		1590.74	397.377	2082.01	138.781	2156.88	33.3516	2708.2	285.048	0.737521
D7-1-24-113	0.149879	0.00676781	8.70734	0.361387	0.425597	0.00463267	0.123214	0.00380042		2346.3	77.465	2307.85	37.8335	2285.84	20.9848	2348.54	68.3885	1.02645
D7-1-24-114	0.127357	0.0152891	8.18466	1.08982	0.410819	0.00811091	0.138709	0.0249356		2062.03	214.042	2251.65	120.491	2218.67	37.0803	2625.48	442.609	0.929401
D7-1-24-115	0.148156	0.0294887	15.747	2.96699	0.531229	0.022236	0.205298	0.0387362		2325.01	347.53	2861.57	179.901	2746.63	93.6243	3774.17	649.586	0.846494
D7-1-24-118	0.0962875	0.0208975	6.68272	1.3984	0.373286	0.0119471	0.1348	0.0272723		1553.71	417.127	2070.34	184.824	2044.84	56.0925	2555.97	485.755	0.759818
D7-1-24-119	0.162624	0.00811681	11.1051	0.648362	0.473696	0.00648384	0.187347	0.0131069		2483.02	83.485	2531.99	54.4121	2499.75	28.3945	3470.87	223.118	0.993308
D7-1-24-13	0.172121	0.00471892	11.7169	0.320846	0.490929	0.00494002	0.144265	0.0049249		2588.89	45.985	2582.05	25.678	2574.69	21.4047	2723.85	86.9931	1.00551
D7-1-24-14	0.161931	0.0042066	10.969	0.274897	0.488795	0.00517871	0.130762	0.00226216		2476.23	44.6	2520.5	23.3837	2565.46	22.4663	2483.91	40.4359	0.965219
D7-1-24-15	0.139152	0.00341292	7.6953	0.179298	0.398793	0.00357629	0.10752	0.00263871		2216.97	42.2825	2196.05	20.9905	2163.48	16.5229	2064.15	48.1564	1.02472
D7-1-24-17	0.166596	0.00386763	11.2654	0.252659	0.487659	0.00430783	0.134954	0.00236518		2523.76	38.89	2545.35	20.9877	2560.54	18.7181	2558.72	42.1212	0.985636
D7-1-24-18	0.162214	0.00372637	9.83741	0.232838	0.436754	0.00474073	0.127548	0.00226735		2478.7	38.58	2419.66	21.8771	2336.09	21.308	2426.39	40.6441	1.06105
D7-1-24-19	0.160486	0.00419223	10.9986	0.293229	0.494363	0.00598445	0.132472	0.0029162		2460.8	44.9075	2523.02	24.8738	2589.53	25.8537	2514.45	52.048	0.950288
D7-1-24-25	0.13019	0.00341146	6.65644	0.204115	0.366084	0.0045079	0.108419	0.00471085		2101.85	45.985	2066.86	27.1058	2010.95	21.3	2080.54	85.9032	1.0452
D7-1-24-29	0.162879	0.00325654	9.13215	0.208864	0.404642	0.00575063	0.137304	0.00291136		2487.03	34.415	2351.34	20.9921	2190.38	26.4182	2600.51	51.7409	1.13544
D7-1-24-30	0.164752	0.00329874	10.7262	0.20579	0.470602	0.00420162	0.134205	0.00392274		2505.24	33.1825	2499.7	17.9004	2486.2	18.4667	2545.36	69.9056	1.00766
D7-1-24-35	0.227354	0.0175164	23.0334	1.76169	0.687054	0.0168137	0.305873	0.0294021		3035.19	124.078	3228.35	74.4618	3371.37	64.2727	5394.08	455.085	0.900283
D7-1-24-47	0.16514	0.0045345	10.2055	0.307727	0.444492	0.00664758	0.124591	0.00260578		2508.95	46.2975	2453.57	27.9345	2370.72	29.6941	2373.3	46.8336	1.05831
D7-1-24-50	0.157522	0.0047908	9.9324	0.290017	0.453793	0.00493732	0.124235	0.00413789		2429.32	51.5375	2428.52	26.9869	2412.09	21.9318	2366.91	74.3937	1.00714
D7-1-24-51	0.161752	0.00614937	10.9465	0.399196	0.488725	0.00520945	0.130299	0.00342552		2473.76	63.73	2518.59	33.9726	2565.16	22.6002	2475.63	61.2558	0.96437
D7-1-24-54	0.145361	0.0139907	9.88357	1.13003	0.433731	0.00943908	0.163412	0.0149769		2292.28	166.82	2423.98	105.439	2322.52	42.459	3059.27	260.197	0.986982
D7-1-24-56	0.14818	0.00663938	9.69918	0.448787	0.470873	0.00405698	0.10136	0.0216918		2325.01	76.85	2406.63	42.6226	2487.39	17.8312	1951.41	398.088	0.934718
D7-1-24-57	0.166264	0.00370049	11.055	0.246088	0.479628	0.00453415	0.0938696	0.00392432		2520.68	36.885	2527.78	20.7989	2525.64	19.8013	1813.47	72.5125	0.998034
D7-1-24-58	0.159975	0.00357191	8.20858	0.168214	0.3725	0.00473286	0.1177	0.00202432		2455.24	38.7375	2254.29	18.6113	2041.15	22.2568	2249.08	36.6073	1.20287
D7-1-24-59	0.160787	0.00325489	8.5222	0.191493	0.382076	0.00471071	0.131041	0.00216195		2464.81	34.26	2288.29	20.4787	2085.97	22.001	2488.9	38.635	1.18161
D7-1-24-60	0.160198	0.00360767	8.51957	0.353302	0.379475	0.0127218	0.124241	0.00358705		2457.71	37.5	2288.01	37.7163	2073.83	59.4607	2367.01	64.49	1.18511
D7-1-24-61	0.14457	0.0081167	6.73235	0.234487	0.365488	0.00798025	0.116321	0.00310641		2282.41	96.4525	2076.88	30.8243	2008.13	37.6901	2224.13	56.2449	1.13658
D7-1-24-63	0.12545	0.00964666	8.46015	0.648171	0.473057	0.00580608	0.124114	0.00706849		2034.87	136.42	2281.66	69.5873	2496.95	25.4444	2364.72	127.096	0.814942
D7-1-24-65	0.0922815	0.0214706	9.95247	1.94371	0.474998	0.0176785	0.161189	0.0166643		1473.15	453.707	2430.39	180.205	2505.44	77.2749	3020.6	290.066	0.58798
D7-1-24-68	0.0964405	0.0199627	7.50661	1.34869	0.433229	0.00845433	0.176914	0.0187006		1566.67	396.14	2173.78	160.992	2320.26	38.0468	3292.49	321.162	0.675214
D7-1-24-73	0.155983	0.00898688	10.5271	0.704666	0.46087	0.006713	0.122938	0.0072874		2412.65	92.4375	2482.31	62.0944	2443.4	29.652	2343.58	131.169	0.987416
D7-1-24-76	0.166372	0.00398446	9.50157	0.240733	0.409059	0.003885	0.111952	0.00214343		2521.3	40.435	2387.7	23.3327	2210.62	17.8138	2144.86	38.9616	1.14054
D7-1-24-77	0.0705201	0.0280498	10.5624	2.70414	0.418138	0.0249034	0.157864	0.0399472		942.59	655.56	2485.42	237.476	2252.02	113.21	2962.64	697.338	0.418553
D7-1-24-78	0.149316	0.00925629	9.33272	0.569745	0.446969	0.00494409	0.114603	0.00310237		2338.89	106.172	2371.24	56.0113	2381.76	22.064	2192.99	56.2585	0.982002
D7-1-24-82	0.169929	0.00352624	9.3657	0.19059	0.396844	0.00326322	0.11888	0.00219808		2557.1	34.57	2374.48	18.7392	2154.49	15.1046	2270.41	39.7077	1.18687
D7-1-24-84	0.166175	0.00432019	10.8911	0.279396	0.47317	0.00518952	0.148327	0.00310919		2520.37	43.8275	2513.88	23.9188	2497.45	22.7487	2795.47	54.7263	1.00918
D7-1-24-91	0.144627	0.00860089	8.06368	0.556591	0.386677	0.00583456	0.104266	0.00440374		2283.64	102.933	2238.18	62.3722	2107.4	27.1477	2004.67	80.605	1.08363
D7-1-24-92	0.149196	0.00427436	8.39966	0.239273	0.408058	0.00555369	0.112099	0.00313451		2336.73	49.075	2275.14	25.8933	2206.04	25.454	2147.53	56.9692	1.05924
D7-1-24-93	0.158965	0.00510896	9.54673	0.330805	0.431232	0.00377459	0.131686	0.00350915		2455.55	53.55	2392.06	31.8897	2311.27	17.0469	2500.43	62.6744	1.06242
D7-1-24-94	0.129891	0.0101089	8.60153	0.96629	0.437009	0.00929098	0.122818	0.0153334		2098.15	136.88	2296.72	102.199	2337.24	41.6984	2341.41	276.023	0.897706
D7-1-24-98	0.158745	0.00367235	8.96714	0.211246	0.406174	0.00403107	0.119417	0.00248342		2442.28	39.1975	2334.66	21.5787	2197.41	18.518	2280.1	44.8406	1.11144
D7-1-24-87	0.478966	0.0146525	59.2791	2.97867	0.848393	0.0239247	2.9752	0.12349		4277.73	50.7725	4162.04	50.2545	3260.14	83.4668	27894.4	627.893	1.31213
D7-1-24-90	0.542352	0.0155724	77.6089	3.79252	1.00852	0.0273379	2.89988	0.146519		4760.81	41.975	4431.62	49.0803	3995.71	87.7757	27507.8	759.375	1.19148
D7-1-24-106	0.480185	0.0130129	43.7137	2.24972	0.641202	0.0197305	0.614505	0.038668		4183.33	39.3525	3858.74	51.1552	3193.74	77.5177	9682.24	484.09	1.30985
D7-1-24-103	0.475701	0.0179849	30.9682	3.16407	0.40042	0.028561	0.64189	0.0639184		4167.64	61.4475	3518.04	100.527	2170.97	131.477	10022.2	786.858	1.91971
D7-1-24-03	0.167306	0.00430136	8.41317	0.25202	0.362115	0.00646814	0.116616	0.00316853		2531.17	42.9025	2276.6	27.2291	1992.19	30.6303	2229.45	57.3546	1.27055
D7-1-24-97	0.157084	0.00353479	7.74392	0.19553	0.356422	0.00646509	0.120415	0.00251588		2424.38	37.495	2201.71	22.7551	1965.19	30.7437	2298.11	45.3864	1.23366
D7-1-24-70	0.155638	0.00547193	7.23916	0.246366	0.336903	0.00520193	0.106114	0.00723532		2408.95	64.9675	2141.34	30.3966	1871.76	25.1035	2038.46	132.212	1.287
D7-1-24-43	0.161092	0.00449638	7.03641	0.210224	0.313976	0.00415547	0.115808	0.00275679		2477.78	46.45	2116.04	26.6003	1760.24	20.409	2214.83	49.9377	1.40763
D7-1-24-111	0.163331	0.00461827	7.09262	0.217812	0.312778	0.00346838	0.103946	0.00288639		2490.43	48.3025	2123.12	27.3671	1754.36	17.0578	1998.8	52.8471	1.41956
D7-1-24-75	0	0	7.57411	2.97049	0.308006	0.0262477	0.230222	0.0786574		error	error	2181.8	351.782	1730.89	129.363	4187.87	1292.32	error
D7-1-24-108	0.0420159	0.0222339	4.33151	1.21308	0.247826	0.0108225	0.0950499	0.0142681		error	error	1699.38	231.033	1427.25	55.9158	1835.27	263.358	error
D7-1-24-99	0.143609	0.00387725	4.62424	0.127451	0.232133	0.00340238	0.0906495	0.00206814		2272.22	46.61	1753.65	23.0406	1345.67	17.8158	1753.88	38.3274	1.68855
D7-1-24-34	0.140207	0.00304317	4.50143	0.111725	0.232018	0.00352146	0.0667592	0.00900817		2231.49	70.835	1731.24	20.6543	1345.07	18.44	1306.22	170.681	1.65902
D7-1-24-89	0.138742	0.00286822	4.1202	0.097626	0.213844	0.00281993	0.0597464	0.00300977		2212.96	35.6475	1658.32	19.393	1249.26	14.9911	1172.91	57.4044	1.77141
D7-1-24-44	0.158064	0.00505383	4.06062	0.135737	0.187291	0.00422105	0.0878623	0.00266781		2434.87	54.01	1646.43	27.2579	1106.68	22.926	1702.16	49.5673	2.20016
D7-1-24-107	0.135261	0.0153499	3.3098	0.374142	0.1607	0.00577494	0.0701611	0.00973347		2168.51	199.537	1483.36	88.1531	960.664	32.0777	1370.57	183.837	2.25731
D7-1-24-41	0.14033	0.00744788	1.17585	0.0714871	0.0592627	0.000937999	0.035329	0.00173637		2231.18	91.9825	789.38	33.3645	371.14	5.71195	701.753	33.8982	6.01168
D7-1-24-66	0.0694032	0.00452046	0.433062	0.0267642	0.0457834	0.000704406	0.0145018	0.000399521		910.8	133.335	365.348	18.9652	288.582	4.34489	291.008	7.95977	1.26601
D7-1-30-1	0.06485	0.00136	1.25505	0.01805	0.14062	0.00186	0.0417	0.00047		769.6	43.47	825.7	8.13	848.2	10.53	825.8	9.03	0.973473
D7-1-30-2	0.06631	0.00135	1.23229	0.01678	0.13501	0.00178	0.04522	0.00049		816.3	42.03	815.4	7.63	816.4	10.11	894	9.47	0.998775
D7-1-30-3	0.10966	0.00228	3.25626	0.04631	0.21572	0.00288	0.06835	0.00106		1793.7	37.4	1470.7	11.05	1259.2	15.26	1336.4	19.99	1.42448
D7-1-30-4	0.06643	0.00178	1.16445	0.02534	0.12732	0.0018	0.038	0.00051		820.1	54.83	784	11.89	772.5	10.3	753.9	10.02	1.01489
D7-1-30-5	0.06596	0.00186	1.11979	0.02624	0.1233	0.00177	0.03784	0.0006		805	57.84	762.9	12.57	749.6	10.18	750.7	11.73	1.01774
D7-1-30-6	0.06358	0.00194	1.09758	0.02863	0.12534	0.00185	0.03906	0.00061		727.8	63.25	752.2	13.86	761.2	10.59	774.4	11.79	0.988177
D7-1-30-7	0.63855	0.02053	0.06175	0.00146	0.0007	1e-05	0.00068	1e-05		4598.3	45.72	60.8	1.4	4.5	0.09	13.8	0.23	13.5111
D7-1-30-8	0.0742	0.00149	1.43211	0.01909	0.14011	0.00186	0.08496	0.0009		1046.9	39.98	902.4	7.97	845.3	10.49	1648.1	16.81	1.06755
D7-1-30-9	0.07245	0.00167	1.29519	0.02238	0.12976	0.00178	0.03896	0.00046		998.5	46.03	843.6	9.9	786.5	10.14	772.6	8.87	1.0726
D7-1-30-10	0.06698	0.00137	1.16603	0.01619	0.12635	0.00168	0.03694	0.00043		837	42.01	784.8	7.59	767	9.63	733.2	8.41	1.02321
D7-1-30-11	0.06122	0.0015	0.98005	0.01889	0.11616	0.00161	0.02962	0.00035		647	51.86	693.6	9.69	708.4	9.29	590	6.78	0.979108
D7-1-30-12	0.07079	0.00155	1.19165	0.01907	0.12212	0.00166	0.03581	0.00042		951.5	44.29	796.7	8.83	742.8	9.52	711.1	8.28	1.07256
D7-1-30-13	0.04894	0.0013	0.13035	0.00284	0.01932	0.00027	0.00599	8e-05		144.9	61.38	124.4	2.55	123.4	1.7	120.7	1.53	1.0081
D7-1-30-14	0.06545	0.00134	1.30153	0.01825	0.14423	0.00193	0.04518	0.00051		789	42.38	846.4	8.05	868.5	10.88	893.3	9.87	0.974554
D7-1-30-15	0.06524	0.00133	1.06112	0.01488	0.11797	0.00158	0.04313	0.00048		782	42.4	734.4	7.33	718.9	9.11	853.4	9.25	1.02156
D7-1-30-16	0.34783	0.01335	25.5219	0.83845	0.5321	0.01422	1.08664	0.05056		3697.5	57.31	3328.4	32.1	2750.3	59.83	2843	489.73	1.3444
D7-1-30-17	0.06455	0.00133	1.20842	0.01713	0.13574	0.00182	0.03962	0.00044		759.7	42.71	804.5	7.87	820.5	10.35	785.4	8.48	0.9805
D7-1-30-18	0.07068	0.00163	0.47659	0.00831	0.04889	0.00067	0.01206	0.00014		948.1	46.46	395.7	5.71	307.7	4.13	242.3	2.86	1.28599
D7-1-30-19	0.05585	0.05098	0.00038	0.00034	5e-05	1e-05	1e-05	1e-05		446.1	1299.94	0.4	0.35	0.3	0.04	0.3	0.13	1.33333
D7-1-30-20	0.06644	0.00143	1.24328	0.01933	0.13564	0.00185	0.0422	0.00051		820.3	44.27	820.4	8.75	820	10.48	835.4	9.8	1.00049
D7-1-30-21	0.82731	0.05159	0.00697	0.00032	6e-05	1e-05	0.00015	0		4969.5	85.81	7.1	0.32	0.4	0.02	3	0.09	17.75
D7-1-30-22	0.06453	0.00135	1.14996	0.01709	0.12909	0.00176	0.03484	0.0004		759.1	43.49	777.2	8.07	782.7	10.03	692.1	7.75	0.992973
d7-1-30-23	0.06322	0.0018	0.276	0.0066	0.03162	0.00046	0.00881	0.00013		715.7	59.28	247.5	5.25	200.7	2.86	177.2	2.61	1.23318
D7-1-42-03	0.0526841	0.00749756	0.136603	0.0140806	0.0195202	0.000524213	0.00621767	0.000283408		322.28	287	130.014	12.5792	124.623	3.31528	125.284	5.69291	1.04326
D7-1-42-25	0.0501514	0.00207022	0.268689	0.0106262	0.0387176	0.00051699	0.0122855	0.000321056		211.185	96.2825	241.645	8.5062	244.879	3.21123	246.805	6.4105	0.986792
D7-1-42-27	0.0563814	0.00143858	0.630825	0.016438	0.0803922	0.000896471	0.0304934	0.000795968		477.82	57.4	496.609	10.2402	498.463	5.35578	607.129	15.6122	0.996281
D7-1-42-11	0.0703284	0.00273774	1.13225	0.0422714	0.117292	0.00161394	0.0348525	0.00105332		938.885	79.6325	768.826	20.1365	714.959	9.31991	692.449	20.5728	1.07534
D7-1-42-19	0.0708745	0.00236716	1.18378	0.0388629	0.120421	0.00136648	0.036692	0.000847831		953.7	68.52	793.071	18.078	732.986	7.87209	728.345	16.53	1.08197
D7-1-42-14	0.0672914	0.00250125	1.18598	0.0438848	0.127994	0.00188555	0.0396937	0.00105437		855.55	77.775	794.096	20.3915	776.411	10.7839	786.783	20.4976	1.02278
D7-1-42-18	0.0690395	0.00241296	1.25221	0.0440208	0.131392	0.0022906	0.0393715	0.0011205		899.69	72.225	824.4	19.8542	795.803	13.0584	780.519	21.7899	1.03593
D7-1-42-06	0.067107	0.00207271	1.30468	0.0404134	0.140765	0.00161541	0.0424933	0.00105237		842.59	64.8125	847.784	17.8145	848.987	9.14014	841.138	20.4037	0.998583
D7-1-42-30	0.152051	0.00341607	7.9675	0.175197	0.377274	0.00333857	0.128881	0.00256487		2368.83	37.805	2227.35	19.8952	2063.54	15.6661	2450.26	45.9232	1.14795
D7-1-42-16	0.122152	0.00296461	6.94099	0.286613	0.405602	0.0130774	0.187252	0.018787		1987.96	43.67	2103.91	36.676	2194.78	59.9876	3469.26	319.836	0.905768
D7-1-42-02	0.133112	0.00315842	7.80571	0.184566	0.42388	0.00426063	0.115812	0.00261268		2139.2	41.2025	2208.86	21.3352	2278.07	19.3286	2214.91	47.3271	0.939039
D7-1-42-04	0.182166	0.0040546	12.067	0.262867	0.478636	0.0039733	0.148029	0.00344478		2672.53	36.725	2609.62	20.5033	2521.32	17.3758	2790.23	60.6489	1.05997
D7-1-42-05	0.168545	0.00362162	11.8027	0.309163	0.503435	0.00688376	0.139142	0.00362693		2543.51	36.1125	2588.88	24.5829	2628.54	29.5502	2633.15	64.354	0.967653
D7-1-42-08	0.0230556	0.0162174	0	0	0	0	0.0147577	0		error	error					296.106	0
D7-1-42-09	0	0	0	0	0	0	0	0		error	error
D7-1-42-13	0	0	2.22769	0	0	0	0	0		error	error	1189.79	0.809059
D7-1-42-20	0.457667	0.0742622	0	0	0	0	0.0861482	0.0945243		4110.34	243.52					1670.29	1759.01
D7-1-42-23	0	0	0	0	0	0	0	0		error	error
D7-1-42-29	0.894657	0.120977	160.339	26.4699	1.44271	0.186083	2.73933	0.244674		error	error	5161.71	166.625	5757.35	491.091	26658	1322.54
D7-1-42-07	0.1214	0.0027551	4.41674	0.110493	0.262653	0.00346624	0.120487	0.00307823		1976.86	40.4275	1715.48	20.7449	1503.4	17.7153	2299.41	55.5276	1.31492
D7-1-42-10	0.0740907	0.00380396	0.496326	0.0246248	0.0480515	0.000586214	0.0379478	0.00187268		1044.14	103.71	409.212	16.7123	302.548	3.60942	752.815	36.4672	1.35255
D7-1-42-15	0.0743687	0.0203475	0.124897	0.038547	0.0134192	0.000730903	0	0		1051.55	575.9	119.502	34.7944	85.9305	4.64955
D7-1-42-24	0.493315	0.0827777	58.2741	17.8923	0.542218	0.173544	0.160712	0.189324		4221.35	250.485	4144.97	306.513	2792.73	725.409	3012.3	3296.82	1.51155
D7-1-42-17	1.29986	0.165354	442.327	50.5749	3.88191	0.415549	5.20308	0.502488		error	error	6188.06	115.912	10221	548.747	36888.3	1637.31
D7-1-42-26	0.90496	0.112133	19.5446	43.2868	0.0867183	0.0809879	0	0		error	error	3069.09	2139.38	536.099	480.42
D7-1-42-01	0.115106	0.0402539	21.348	10.3993	0.281264	0.142774	0.227706	0.212606		1883.34	670.52	3154.53	472.497	1597.72	718.339	4146.49	3500.21	1.17876
D7-1-42-21	0.0119488	0.0119523	1.12193	0	0.0323016	0	0	0		error	error	763.901	0.519453	204.937	0.110666
D7-1-42-22	0.45466	0.0948876	0.0181562	0	0.000781703	0.00325794	0.193349	0.138632		4100.57	315.46	18.2702	0.0124237	5.03722	20.9856	3572.79	2348.07	3.62704
D7-1-42-28	0.828655	0.0194744	42609.9	5561.15	371.493	48.293	575.411	95.5964		error	error	10823.8	132.722	38164.2	836.019	128486	3352.15
D7-1-42-12	0.550538	0.106597	36.991	64.0816	0.248355	1.07794	0.131881	0.010568		4382.57	287.348	3693.3	1712.71	1429.99	5566.39	2503.9	188.715	3.06476
*footnotes：Filtering of zircon U-Pb ages are made with following procedures:
Given that (206Pb/238U)age is more precise for young samples, whereas the (207Pb/206Pb)age is better suited for older samples , (206Pb/238U )age are taken for zircons <1000 Ma and (207Pb/206Pb )age are used for zircons >1000 Ma in this study.
Concordance = (207Pb/235U )age/(206Pb/238U )age for young samples ((206Pb/238U)age<1000Ma),while for old samples ((206Pb/238U)age >1000Ma),concordance = (207Pb/206Pb )age/(206Pb/238U )age, and zircon U-Pb ages with concordance between 0.9 and 1.1 are preserved.

## Sheet: Table DR3
Table DR3. Trace element data for zircons in the GR lavas
Spot	P	Ti	Y	Nb	La	Ce	Pr	Nd	Sm	Eu	Gd	Tb	Dy	Ho	Er	Tm	Yb	Lu	Hf	Ta	Pb	Th	U
D7-1-24-26	188.113	6.49961	2808.16	40.8192	874.476	3883.04	210.499	858.988	234.888	87.1061	298.844	54.4246	388.489	93.2092	313.082	53.4292	399.114	60.8319	6224.91	1.87439	73.8631	1697.88	2672.51
D7-1-24-64	1780.88	11.9639	470.196	1.39895	2.29363	34.0273	1.40528	7.53184	4.17678	1.10901	12.1498	3.42898	39.4793	14.9913	70.4044	16.8434	166	39.1507	10524.6	0.860937	31.4369	608.073	605.965
D7-1-24-27	7757.92	658.939	5002.8	8.96746	161.368	644.533	119.519	716.217	265.204	19.492	408.665	82.239	666.745	196.803	707.072	122.068	973.673	180.92	7881.38	1.42457	22.6133	476.67	306.452
D7-1-24-37	562.746	2.10279	3687.23	9.97152	5.65609	68.5377	2.8803	21.1473	24.8407	1.06666	126.423	37.6468	405.484	141.519	560.285	103.202	841.842	161.813	8482.85	2.3477	30.3075	670.102	466.2
D7-1-24-52	251.085	2.86501	867.513	1.22176	0.0689347	28.579	0.0412192	1.07188	2.93082	0.978948	17.4467	5.91385	71.97	28.097	134.4	29.2334	282.374	63.9094	10599.5	0.592757	17.6776	258.849	338
D7-1-24-24	486.567	3.92533	1147.17	1.25767	0.155845	10.6863	0.10503	0.895885	2.17885	0.948697	16.4883	6.42389	87.911	38.0757	193.205	43.9375	452.411	107.752	10155.8	0.412599	10.9588	120.344	165.812
D7-1-24-105	1283.63	3.06921	2434.81	10.6829	0.753809	18.8006	0.392341	3.61722	4.44172	0.734583	34.2315	15.3372	199.801	83.1284	394.873	87.8906	814.866	163.884	10738.5	6.1711	55.2768	228.819	667.15
D7-1-24-48	1555.55	17.889	5283.11	8.28388	15.1111	99.083	12.5225	60.7884	52.9169	7.33736	146.582	54.7667	574.531	173.933	666.578	123.717	976.248	177.539	10422	2.23106	116.106	235.853	1009.59
D7-1-24-83	346.05	10.3911	876.132	2.36236	2.7156	15.1036	2.15091	11.1736	9.11664	0.723605	28.6018	8.54213	91.2402	31.0826	144.332	27.1208	225.933	45.8873	10224.4	0.74036	44.5257	64.6599	263.965
D7-1-24-11	853.113	2.59	2125.87	9.5263	11.0946	50.1526	2.90631	18.7678	12.5822	0.150926	58.1371	18.3943	214.523	78.4574	337.103	63.7584	539.856	105.29	9365.43	2.67451	29.3475	160.372	223.372
D7-1-24-01	1964.93	108.738	1379.63	2.79841	19.9417	61.6382	6.28826	31.5918	12.5852	0.877079	40.023	11.6995	130.145	47.4814	208.245	41.2186	370.773	74.1028	10616.7	0.966034	17.8966	115.563	131.371
D7-1-24-10	1742.79	4.4402	1204.04	1.32907	11.7435	45.7922	3.5179	15.9051	6.7615	1.40116	26.5368	8.77297	101.712	40.6255	195.911	43.2159	423.738	96.7266	11053.8	0.880112	56.3508	255.029	345.483
D7-1-24-33	293.215	4.40314	1902.92	2.72523	1.11996	17.2565	1.04926	10.0117	12.5754	1.36476	54.5801	18.4843	198.329	69.5314	291.499	56.1425	503.82	97.9546	10482.2	1.05182	63.714	151.386	473.263
D7-1-24-95	524.889	5.15716	1634.1	2.36512	0.193978	7.20442	0.358801	7.56698	12.9884	1.4879	58.0761	17.2175	178.444	60.2183	245.447	46.8214	404.269	78.0547	8639.98	0.704819	32.2556	104.022	237.357
D7-1-24-28	956.978	8.66686	2962	5.7605	4.75548	69.0411	3.07007	20.0305	23.1993	2.4981	89.2534	29.7694	326.525	106.269	429.72	81.6997	699.841	132.716	9784.32	1.66729	88.3502	217.717	735.059
D7-1-24-71	649.49	8.48202	1695.36	1.88132	0.00669676	23.104	0.11399	1.42684	4.797	0.652063	30.764	11.3574	142.308	58.8564	268.86	59.3119	533.022	114.742	10557.3	0.866203	56.3329	224.054	255.492
D7-1-24-20	1027.52	11.974	3108.81	2.46826	0.943343	13.2077	1.43469	13.527	19.8588	2.82262	86.777	29.3405	325.217	116.641	485.944	93.4619	813.942	161.548	9457.88	1.08275	110.965	379.993	532.605
D7-1-24-46	677.858	15.2783	1099.92	1.05892	2.37667	13.3162	3.30884	24.0725	21.2532	5.06185	53.9717	17.215	148.121	37.2495	122.528	21.1964	168.716	29.3061	12739.5	0.932664	254.679	101.877	642.847
D7-1-24-22	272.377	13.1602	698.967	2.05475	0.00666647	16.5547	0.0551316	0.902042	2.03419	0.246265	13.1036	4.48919	59.6954	24.2275	115.285	24.41	237.216	49.4891	11402.5	1.39024	76.5634	180.157	291.134
D7-1-24-21	1177.72	8.77246	2854.74	1.85709	2.19709	26.1872	3.8565	26.7646	27.2357	5.32756	87.2714	28.2911	304.53	104.141	442.817	85.6451	724.584	135.694	12165.1	1.49006	145.903	444.224	663.712
D7-1-24-38	718.974	17.1201	1501.45	1.52279	0.596553	7.76165	0.958057	7.63231	9.46004	2.36872	43.0586	14.003	152.773	55.4522	231.941	44.9291	400.709	79.7735	9277.09	0.468124	75.5338	125.101	159.567
D7-1-24-16	340.81	10.9247	917.062	1.19538	0.0373574	20.9111	0.19687	2.78417	4.55487	0.817496	24.5264	7.63696	87.3686	32.1853	140.379	27.6406	249.882	51.9649	10541.5	0.600135	80.7471	227	216.698
D7-1-24-109	1049.18	121.877	4028.82	14.1852	23.8787	186.003	11.7786	65.4711	52.7607	14.9554	171.104	57.0396	488.846	140.677	517.763	94.6282	767.582	141.794	10127.4	1.74112	386.526	725.291	509.149
D7-1-24-80	890.417	112.161	3398.82	18.5215	30.5043	197.741	13.4131	67.1199	49.7759	9.35312	139.653	40.2202	389.085	120.449	463.685	88.5917	725.97	132.923	9334.12	2.17566	346.778	820.352	531.3
D7-1-24-116	623.988	84.7652	1416.14	6.52644	12.5877	79.8141	6.64939	31.2327	19.2954	4.95472	51.7603	14.8893	155.964	49.5248	208.027	39.8039	345.012	67.3028	10532.8	1.01411	237.817	234.513	301.322
D7-1-24-53	820.057	230.482	2271.97	12.7875	22.6847	145.918	11.6885	55.8021	35.8259	10.8021	89.8318	27.3321	265.612	78.0286	296.521	56.6808	477.296	90.2463	12543.2	2.16154	354.707	528.142	399.935
D7-1-24-72	470.141	17.9785	1435.33	8.82162	7.08857	80.9605	3.61762	22.6192	15.5201	4.09177	49.0744	14.3882	145.319	48.7735	204.18	42.5895	396.316	80.3366	10888.4	1.35086	377.378	397.291	448.565
D7-1-24-23	180.468	11.2126	576.407	5.69012	0	13.4317	0.120948	1.83233	3.27515	0.0337858	16.0357	4.7748	57.335	20.8669	89.2557	17.8996	163.215	32.7666	12822.4	2.47101	108.696	167.369	277.874
D7-1-24-67	11411.6	64.3207	3033.49	8.57859	32.9431	179.038	27.0817	166.028	82.301	14.8277	168.412	42.6872	375.463	105.548	383.485	72.1389	580.972	108.093	8917.21	1.51379	282.061	468.862	329.277
D7-1-24-74	652.263	221.036	3173.7	9.47412	9.72337	151.22	6.62392	41.9722	36.8676	9.76528	128.719	34.9882	337.729	109.245	427.557	81.5875	684.04	131.229	9378.16	2.44227	265.507	635.568	438.456
D7-1-24-12	734.358	6.03076	1369.85	2.16543	4.69228	34.1174	1.90502	13.1163	7.73507	3.92534	29.1054	9.46674	115.053	46.2393	221.313	48.7064	499.267	107.52	11308.9	1.12358	303.937	477.971	817.838
D7-1-24-45	919.091	42.8453	3330.09	15.3443	12.4871	213.299	10.3012	63.241	51.9343	12.4792	142.274	38.4559	366.337	114.535	455.592	85.1849	727.948	138.61	9675.9	2.71608	341.685	910.579	486.134
D7-1-24-42	563.797	44.9607	1556.33	7.96664	3.42579	81.3935	2.88124	15.9101	16.3538	3.77087	51.8907	15.3039	158.833	52.8461	222.012	42.6753	383.253	74.7955	8633.97	3.01393	199.455	373.945	272.276
D7-1-24-09	12440.5	16.1699	2001.67	2.21087	45.2167	164.602	21.9041	106.587	27.693	3.65706	61.2183	17.2894	193.994	71.2312	313.403	64.5746	589.502	121.059	9953.65	0.96763	227.599	364.758	469.836
D7-1-24-02	378.898	24.0923	1761.72	6.93277	1.23035	99.805	1.09858	12.1974	15.117	2.73015	65.2924	17.3726	182.486	62.8297	256.338	49.137	424.97	82.8731	8909.79	1.24781	185.271	500.042	228.75
D7-1-24-04	435.241	13.9252	1524.01	3.13281	1.90395	56.8323	0.946932	8.67253	14.3568	2.78271	53.6759	15.0503	154.793	53.2649	224.75	43.3538	379.987	76.2353	9282.25	0.810985	106.619	228.044	134.054
D7-1-24-05	323.543	5.07131	351.599	0.936947	0.00589693	9.41048	0.0178054	0.25041	0.839019	0.269973	6.36037	2.08921	27.2932	11.406	58.6559	13.191	129.279	29.0878	12323	1.38867	274.144	148.887	496.872
D7-1-24-06	423.965	6.09685	1086.85	2.76664	1.01283	48.5073	0.673334	7.1506	9.91125	1.61371	36.2438	10.1392	105.364	37.6603	162.126	31.9032	294.723	60.1833	11896.4	0.568016	110.545	210.545	149.784
D7-1-24-07	984.968	11.2029	1422.19	2.85337	7.46821	70.5311	2.94571	20.1628	14.4885	2.50152	51.388	14.571	141.319	50.0445	205.06	39.0091	345.071	70.6278	9333.44	0.743102	115.955	267.909	143.211
D7-1-24-08	343.34	18.8276	2031.38	4.40388	0.921065	64.4053	1.15631	13.3308	17.2856	3.36251	75.1855	20.6442	209.602	73.2999	299.125	56.3421	482.727	97.4964	9709.89	0.826709	163.154	366.644	177.201
D7-1-24-100	1202.1	9.22269	838.372	2.90143	7.62543	44.0239	3.93255	20.5117	9.14318	2.68429	25.1379	7.76346	77.4237	28.2466	125.57	27.3441	258.437	54.861	9932.34	1.48505	250.901	102.843	247.686
D7-1-24-101	190.572	10.6773	746.783	2.29388	0.468942	30.8262	0.371789	4.73021	5.37289	1.18478	24.7112	6.83837	73.1714	24.8697	105.122	21.4427	200.772	44.177	13902.3	0.654768	148.181	156.797	177.027
D7-1-24-102	441.345	34.1263	2006.6	3.8625	2.04936	68.0214	1.25156	15.6576	19.4847	4.22532	76.7548	20.6929	208.425	70.102	278.667	53.0851	461.713	89.8405	9673.14	0.810305	171.937	328.694	153.276
D7-1-24-104	501.908	14.5736	1372.27	2.31289	1.03863	53.9993	1.10315	13.4165	13.9001	3.50154	50.3416	13.8226	137.718	47.0433	193.832	37.27	321.39	61.1895	8567.29	0.576833	89.351	132.137	71.082
D7-1-24-110	1438.78	239.988	1671.04	5.02625	15.464	79.2149	6.22646	37.4828	23.3616	4.12989	67.8014	17.7208	171.436	58.1854	227.481	44.4522	382.469	74.1966	8992.26	0.814292	178.597	278.628	175.029
D7-1-24-112	546.703	108.931	1030.68	5.51666	8.04348	60.2915	2.9842	16.4213	12.3329	2.56354	32.4379	9.85126	101.064	35.2723	148.469	30.0631	262.341	53.579	10349.3	0.969777	219.57	195.819	179.672
D7-1-24-113	563.977	31.6783	1952.45	7.33385	1.82275	93.6018	1.50656	14.2964	18.8186	3.6948	68.7502	19.1783	194.864	65.039	270.781	53.3008	444.08	85.226	8374.18	1.23552	199.618	484.697	226.926
D7-1-24-114	322.545	41.0905	1013.89	4.24515	3.52008	47.3898	1.85931	12.2472	10.6214	2.55884	36.1049	9.83932	99.833	34.0921	142.851	28.6058	262.939	52.7646	13348.7	0.772277	200.794	211.041	206.703
D7-1-24-115	565.734	107.946	1748.46	4.89628	5.02464	73.3248	1.8409	14.8825	15.5017	3.12284	64.2048	17.1843	175.184	60.3555	244.988	47.632	395.529	75.7028	10086.4	1.11585	289.514	313.015	156.295
D7-1-24-118	329.629	31.8149	1260.76	3.25885	2.41827	47.1779	1.56836	13.1165	12.6721	3.04107	46.7546	13.0118	128.123	44.8483	179.166	34.2099	297.414	57.9093	9358.27	0.822983	119.095	169.395	121.526
D7-1-24-119	271.906	31.7571	700.061	4.18473	1.31919	41.1078	0.554689	4.87794	5.39979	0.850534	20.5343	5.88664	66.2522	23.5142	100.618	21.1964	192.493	40.7977	11971	1.49027	186.437	147.556	149.926
D7-1-24-13	733.094	10.9425	570.103	2.02204	5.43471	41.0352	1.38178	6.68783	4.36879	0.87266	15.5818	4.48735	52.0024	18.9773	85.5918	18.3232	174.438	39.6003	11388.3	0.536148	75.3712	97.9742	101.135
D7-1-24-14	547.134	11.0258	2050.6	3.74883	0.38975	79.4442	1.13273	14.8149	20.0315	3.9164	82.1804	21.8014	218.893	73.8413	301.066	56.0324	492.545	96.8261	8876.28	0.890526	150.79	393.244	175.2
D7-1-24-15	420.748	5.82788	1025.69	3.94822	2.35128	41.3366	1.45526	12.6479	5.5318	2.717	20.3818	6.93511	82.1467	33.4522	163.898	34.5817	339.725	71.5313	11460.4	2.11559	185.495	257.65	323.134
D7-1-24-17	1250.07	12.0414	2097.32	2.9426	6.96439	96.0127	3.97041	30.5877	27.6837	4.58774	93.9875	23.362	225.306	73.9849	302.85	56.5658	487.132	96.1553	9200.95	0.755211	138.896	376.147	153.786
D7-1-24-18	426.795	8.76053	1385.19	6.46761	0.528407	95.2784	0.747231	7.55874	10.6332	1.93436	46.3818	12.5688	137.973	48.0401	202.52	40.5038	356.994	71.3313	10234.2	1.36392	159.3	370.752	211.7
D7-1-24-19	330.95	10.7186	639.856	1.92017	0.0245084	37.8108	0.129091	2.90432	5.12746	0.941651	19.6467	5.90459	60.962	21.4593	94.9134	19.4884	175.306	37.3116	9207.01	0.63789	62.2481	116.068	81.4746
D7-1-24-25	426.162	19.0194	914.369	2.59629	33.8507	87.9383	7.05833	28.0257	8.16195	2.03748	20.8517	5.82987	71.6777	30.2444	144.632	31.9257	296.83	65.0915	10617.1	1.33233	185.639	189.188	382.985
D7-1-24-29	304.541	16.0207	1190.25	5.6212	0.749992	51.7094	0.83263	8.06154	9.99973	2.43088	41.744	11.2872	119.639	41.0529	175.48	35.486	317.106	63.8214	12139.3	3.49938	230.868	285.113	422.179
D7-1-24-30	447.564	10.7008	1054.05	2.20847	0.0288629	36.844	0.151634	2.43645	5.86035	1.38844	25.2476	7.95684	88.8679	34.1868	161.055	35.1515	333.988	76.1728	9698.93	1.02349	202.778	217.023	309.921
D7-1-24-35	1236.8	325.772	665.091	7.23099	71.0299	213.787	12.3057	39.1298	9.61132	1.39521	20.0412	6.25632	64.5797	22.0099	96.2744	19.3504	176.103	35.0378	9584.75	1.00736	444.696	192.627	146.552
D7-1-24-47	1059.5	38.5009	2552.63	5.95165	5.08283	99.8497	3.86679	29.3117	28.855	6.14614	110.999	27.8504	272.099	90.6112	353.508	67.549	572.112	109.944	8401.33	0.92821	177.553	496.725	215.831
D7-1-24-50	313.48	5.572	818.896	2.90158	0.262051	43.1035	0.434885	5.77717	7.96047	1.26044	33.6466	8.32104	85.6959	28.2077	118.125	23.8199	209.475	44.3992	13300.3	0.559807	122.869	202.987	161.939
D7-1-24-51	377.702	13.4677	1327.75	1.72047	0.0608003	39.3211	0.699971	8.33144	13.3742	2.3391	47.9191	13.5516	134.327	46.271	189.617	35.8712	313.417	62.3541	9046.49	0.539391	85.2298	174.011	90.6635
D7-1-24-54	694.895	129.909	1348.7	4.83499	5.26184	57.3575	1.88523	13.0597	13.1947	2.24573	44.551	12.1157	131.61	45.6647	192.786	38.4132	345.149	71.502	9990.26	0.851654	312.229	239.595	193.319
D7-1-24-56	910.813	7.31935	1509.54	3.73336	0.21218	8.8293	0.285306	2.49528	3.23814	1.01938	19.3365	8.23289	114.582	48.8023	232.023	47.5857	415.259	82.0851	12603.2	1.30125	199.919	85.8415	271.94
D7-1-24-57	1196.94	11.6034	1047.7	1.84303	2.33939	39.5654	1.603	11.43	10.2918	2.22089	36.6765	10.107	104.036	35.0204	149.737	28.8999	252.674	51.8015	9929.91	0.618962	77.4104	232.405	94.8509
D7-1-24-58	382.946	29.6523	3286.4	8.33412	4.92031	122.303	3.35219	29.1292	35.1821	6.29272	130.566	35.4124	356.333	115.847	462.256	87.0724	723.108	140.293	9529.44	1.04051	244.045	727.001	339.603
D7-1-24-59	476.272	13.1385	2951.07	6.98541	1.60988	90.8674	2.25173	21.1563	29.1338	5.5898	115.017	30.2584	310.419	103.139	413.646	78.5077	647.787	126.757	8150.79	1.02814	203.7	585.79	281.321
D7-1-24-60	341.249	7.8991	1202.69	2.16141	2.32709	35.3312	1.88518	12.1838	14.3331	4.90026	52.2825	16.2086	146.216	41.0789	153.409	28.4039	246.671	50.3971	10748.9	0.344204	65.4005	126.301	140.549
D7-1-24-61	485.74	14.5534	2682.87	8.12182	7.40647	117.376	4.79274	30.2126	31.0776	7.16538	107.3	28.8685	294.133	94.3535	379.645	70.6538	596.15	115.786	8888.94	1.19718	215.158	574.385	281.518
D7-1-24-63	258.078	5.39563	1452.58	5.02431	0.766791	72.9023	0.703419	9.55938	14.2146	2.36374	56.1418	14.9701	152.281	50.2477	206.137	38.7261	334.029	67.4497	11995.9	0.880318	263.037	372.387	201.877
D7-1-24-65	1027.61	205.816	2391.06	7.31921	9.09935	106.645	3.5217	27.8855	24.1156	5.4712	95.1575	25.6167	254.367	82.9625	338.671	64.3505	543.894	104.724	8063.49	1.30052	467.683	521.444	257.233
D7-1-24-68	515.543	27.3883	1478.68	5.80403	4.61866	85.9678	3.17134	19.3208	17.5458	3.27948	53.7064	15.1495	147.477	48.6898	200.436	39.6103	348.363	67.3772	10760.9	1.0484	348.401	340.695	233.578
D7-1-24-73	2599.32	35.6479	1590.96	5.64531	9.14431	104.072	6.2683	40.3158	24.9435	2.53244	63.3412	16.0579	154.556	53.9146	216.397	43.2877	365.345	71.4885	10361.7	1.52221	202.659	334.038	203.522
D7-1-24-76	501.032	23.8321	3135.77	9.29314	0.777788	162.767	2.27484	26.9906	38.4941	6.56082	128.936	35.2249	331.635	109.65	433.167	81.9473	678.153	128.747	8517.52	1.4388	243.496	805.957	306.219
D7-1-24-77	406.557	17.1755	964.365	2.19819	2.15872	43.2204	1.75691	11.1103	9.49396	2.91739	33.2959	9.77094	97.8606	32.6461	136.484	27.4111	241.485	47.7239	8864.58	0.502035	140.511	123.23	104.596
D7-1-24-78	765.08	24.277	2095.67	5.63818	2.30671	100.439	1.76441	19.3796	20.873	3.69328	80.1445	21.7248	216.534	72.5023	292.048	56.1175	463.684	89.9009	9005.31	0.95461	199.656	500.86	206.116
D7-1-24-82	402.147	23.1779	1732.83	6.50876	2.83378	93.8993	1.81866	14.4503	18.1004	3.21034	63.3424	17.3686	176.903	59.4429	245.038	48.5314	407.822	78.9556	8790.21	1.43375	139.283	412.614	198.636
D7-1-24-84	1641.88	11.1205	1244.57	4.09889	5.68527	86.4435	3.37965	22.1871	14.7529	2.50828	44.7826	11.7578	119.57	41.9851	176.233	35.6289	312.432	62.85	8779.16	1.06233	80.3942	155.05	104.455
D7-1-24-91	698.485	48.1971	4203.37	10.4777	3.57417	200.739	3.81019	39.421	50.4584	8.49186	174.417	48.321	450.938	147.846	583.55	108.679	903.232	170.077	9079.73	1.32029	350.381	984.286	366.608
D7-1-24-92	1133.36	12.5055	1802.08	3.27866	1.80975	54.0214	2.12257	18.6733	19.2243	3.57372	66.9179	18.6343	180.854	63.0704	251.895	49.0846	422.651	81.4727	8450.69	0.745951	107.927	264.197	140.425
D7-1-24-93	413.686	10.9718	1431.65	4.55206	0.529636	56.1203	0.761845	8.13557	10.6619	2.22548	44.4441	12.9765	133.477	47.7895	204.617	41.5239	363.933	72.9882	8290.36	0.81881	125.418	254.633	154.604
D7-1-24-94	389.524	18.5791	1123.83	2.19844	0.206773	47.1071	0.390442	6.5798	8.84508	1.35451	38.7252	10.0932	107.587	38.5886	159.629	32.3699	277.619	54.5609	10734.9	0.700968	98.3336	157.183	109.158
D7-1-24-98	506.323	13.8336	2822.13	9.33951	1.62021	150.232	2.42879	23.3637	29.1606	5.30304	115.727	30.4552	299.759	99.3795	384.601	73.6332	600.918	116.047	9047.12	1.36644	260.087	828.623	330.546
D7-1-24-87	684.603	46.2018	652.169	3.25716	2.32874	15.347	0.795019	4.87374	2.96355	0.852618	10.0027	3.92649	50.4287	19.5681	102.956	23.9476	235.53	49.4205	12264.9	3.57033	778.167	114.465	428.394
D7-1-24-90	335.461	25.0895	950.639	4.64575	1.19235	17.2125	0.882344	7.88691	8.0382	2.05653	25.312	8.48957	91.4844	31.6041	139.422	29.5631	268.55	53.5045	9893.3	1.80137	349.743	51.1908	116.001
D7-1-24-106	511.955	47.2084	834.704	2.5168	5.42408	42.2208	2.27351	12.2477	9.10269	2.09094	27.6756	8.17032	84.2811	28.3561	119.616	23.6574	207.464	42.1075	10201.2	0.567445	159.923	127.678	92.7987
D7-1-24-103	267.705	16.1326	531.987	0.414135	0.420809	13.3336	0.158016	3.02788	3.22019	1.46178	12.6262	3.98315	42.421	17.3541	83.7157	17.7813	179.678	42.2394	10235.9	0.158885	148.136	104.015	113.814
D7-1-24-03	1510.2	18.4558	625.58	4.40104	9.05908	55.8442	4.67714	22.0755	9.5384	1.7005	24.4242	6.39524	66.0307	21.7756	90.7119	17.882	162.434	32.5157	8729.08	0.574832	57.488	135.468	106.445
D7-1-24-97	762.898	16.7346	3218.04	5.86278	2.54103	99.9446	2.17862	23.9417	43.5657	12.4549	160.121	46.2969	404.193	114.888	413.152	75.8764	617.56	114.7	8708.24	1.2167	173.547	463.659	265.709
D7-1-24-70	289.622	15.9889	618.887	4.29588	6.06165	49.8794	3.62433	15.1191	9.99986	3.04021	18.4415	5.49859	57.9202	19.5341	88.3018	19.1267	176.575	37.3567	13677.1	1.00347	147.816	157.854	253.845
D7-1-24-43	596.252	20.7796	1858.72	11.2789	8.71661	132.399	5.65927	29.2764	21.4457	4.91903	63.5198	18.5872	192.478	64.7138	262.623	51.2411	424.909	81.3975	8384.46	1.48551	257.998	673.879	420.353
D7-1-24-111	555.548	24.4488	1167.21	8.46069	9.33582	85.626	4.6193	24.3125	14.6235	3.17371	36.3088	11.4813	118.69	40.5309	165.006	34.0492	292.499	56.5649	11439.9	1.41656	147.667	318.945	259.781
D7-1-24-75	737.17	98.2909	1350.54	9.70729	16.5611	68.0377	6.71876	31.0053	18.7321	4.36759	39.242	13.8484	140.415	45.6209	189.348	38.5071	340.989	67.6318	10873.1	0.994059	493.678	195.05	285.833
D7-1-24-108	643.887	212.282	2486.07	8.64456	13.5363	95.2467	6.80659	37.4146	28.2554	6.32871	93.524	26.5932	285.67	89.3114	347.389	67.2415	583.21	109.556	9163.86	1.20397	302.533	420.999	297.142
D7-1-24-99	451.072	22.775	2158	17.5491	13.6625	145.02	8.64031	41.7379	27.0856	8.35272	74.0837	21.9071	234.094	72.7571	293.823	56.5226	501.576	93.1866	9915	3.40911	228.923	702.758	551.31
D7-1-24-34	825.762	56.9512	3092.77	3.68389	15.0606	91.8472	13.3996	79.8836	56.949	27.4503	123.506	37.9762	372.899	107.684	411.06	81.7114	698.079	127.682	11582.2	0.68564	288.218	285.633	958.267
D7-1-24-89	159.216	21.228	301.681	0.832397	28.0345	62.0659	5.34143	18.325	3.86259	0.707749	7.81859	2.01161	23.3838	8.9401	42.4677	9.85322	102.79	23.9675	11950.5	1.0652	174.994	95.7914	697.915
D7-1-24-44	541.833	32.9148	2508.71	21.3331	63.3413	147.422	30.4296	124.749	62.1372	18.0022	115.806	35.8934	342.009	94.1841	347.499	62.6435	545.014	98.4529	13163.7	1.75834	240.258	458.467	701.745
D7-1-24-107	1021.26	70.3662	3538.68	19.1188	48.2345	238.697	27.1887	128.219	74.09	27.1337	154.015	50.4098	464.299	123.994	459.49	85.3953	705.57	123.866	12113.8	3.47492	276.095	761.717	784.477
D7-1-24-41	389.358	5.50887	1181.21	1.35106	0.0148455	9.95596	0.0667444	0.969587	2.60038	1.01478	16.3375	6.48104	88.2613	37.7579	197.484	45.9703	469.874	111.061	8945.77	0.493442	15.2484	111.083	160.13
D7-1-24-66	1207.34	9.60243	1269.32	3.69248	4.37382	36.1682	2.98533	17.0304	10.2058	1.11907	34.5496	10.6547	119.04	45.1842	192.323	39.2665	352.02	72.8521	7807.5	1.03175	9.69403	168.991	147.244
D7-1-42-03	450.773	11.6829	1973.73	2.24361	0.136371	36.9566	0.320248	4.86932	9.00258	2.78112	44.3555	14.8344	173.417	68.2083	312.257	65.1233	601.306	128.616	8236.09	0.685242	2.83848	134.989	99.1556
D7-1-42-25	376.993	4.97957	921.88	2.44707	0.778135	35.7556	0.25904	2.67059	3.53162	1.13263	18.6621	5.75404	70.7594	28.6691	144.132	33.0062	341.728	81.402	10230	1.29437	39.7031	725.928	723.114
D7-1-42-27	138.546	1.97095	525.573	3.22368	0.675808	15.4716	0.662561	4.1352	2.81015	0.427654	8.38393	2.75799	36.6602	15.5317	76.2345	17.793	182.919	40.0227	16200.5	4.14873	227.472	201.249	2535.28
D7-1-42-11	286.659	4.32779	1137.13	2.11342	0.238135	10.8131	0.273092	4.30553	4.30457	1.16364	21.8484	7.47745	88.6889	36.2413	175.01	39.7345	382.277	83.8998	9087.45	0.571674	24.3874	157.802	152.549
D7-1-42-19	303.34	3.95247	1285.75	3.77781	0.0547282	15.0524	0.117421	1.8854	3.25676	0.77062	19.896	7.1677	92.2907	40.4035	201.826	47.1877	461.805	104.319	9453.38	0.991306	45.1186	249.759	267.452
D7-1-42-14	231.82	3.66008	674.343	0.838477	0	14.6389	0.0287195	0.825619	2.77485	0.501606	14.0792	5.0051	56.9688	22.6435	107.279	23.7625	230.415	50.9645	13437.2	0.803538	21.0462	81.718	131.22
D7-1-42-18	253.894	4.46496	1462.98	2.02076	0.0111211	11.6716	0.238607	3.2874	5.15581	1.27632	29.6227	10.0688	120.782	47.1458	223.896	49.8895	475.397	105.025	8486.77	0.521178	32.9296	211.298	181.23
D7-1-42-06	315.793	4.37828	988.97	1.76856	0	6.64471	0.08384	1.14794	2.32269	0.553339	12.8758	4.78554	67.6499	31.0018	161.818	38.0563	389.104	91.6185	8053.77	0.726006	25.2563	86.9314	144.297
D7-1-42-30	446.607	12.8874	1760.27	5.42513	0.0362742	69.0879	0.47857	8.63704	14.6865	4.20986	50.7163	16.116	166.594	59.0424	255.588	52.8823	482.403	98.8305	8403.77	1.02906	139.357	230.503	245.017
D7-1-42-16	700.272	96.6056	1112.31	80.9494	6.57306	13.5618	1.57961	8.55286	4.87504	1.71359	11.8761	4.38741	62.8995	31.9187	202.923	62.2593	776.296	199.62	15987.1	99.5706	865.792	213.432	1749.12
D7-1-42-02	301.391	11.9115	707.635	2.35711	0.718335	26.9106	0.633546	6.82296	5.22748	8.98428	15.5066	4.54771	53.8366	22.5273	110.65	24.5335	234.094	49.9662	10233.3	1.13666	100.81	115.82	184.271
D7-1-42-04	290.98	8.12168	519.968	0.923116	0.07775	5.03082	0.0780719	0.921602	1.2911	0.539184	7.98233	3.15697	39.0429	16.7112	82.7895	18.967	189.776	41.1475	11430.8	0.629064	143.063	41.1709	241.056
D7-1-42-05	327.592	3.09145	503.007	1.00677	0.0707111	7.8816	0.0603674	0.624891	1.05548	0.275189	9.16844	3.47823	40.941	16.5079	80.1333	16.6448	163.103	34.6519	11691.2	0.609869	99.2341	47.6669	162.575
D7-1-42-07	2708.88	20.9002	2932.87	6.9091	5.56629	66.1663	13.8052	135.586	81.415	26.0294	144.857	37.5837	361.756	107.955	384.164	73.4918	631.883	122.743	14231.1	29.1074	462.766	295.511	1447.03
D7-1-42-10	5343.3	607.345	9861.32	80.1163	0.840239	126.782	17.6636	180.382	200.213	73.4877	571.274	161.368	1422.97	347.639	1026.93	164.45	1236.07	201.034	10900.8	1.81385	134.05	486.493	1828.07

## Sheet: Table DR4
TableDR4. Hf isotopic data for zircons in the GR lavas.
Spot	Inferred age	1sigma	Hf isotopes
	(Ma)		176Hf/177Hf	1sigma	176Lu/177Hf	1sigma	176Hf/177Hf (T)	εHf(T)	2sigma	TDMC (Ma)
D7-1-18-01	835	10.66	0.282501	9.62572e-06	0.00173626	1.74066e-05	0.282474	7.9089	1.39971	1083.35
D7-1-30-01	848.2	10.53	0.282501	7.50951e-06	0.00170109	1.95651e-05	0.282474	8.21676	1.37654	1081.97
D7-1-30-02	816.4	10.11	0.282554	8.96208e-06	0.00177251	2.19444e-05	0.282526	9.36644	1.46781	1008.69
D7-1-30-04	772.5	10.3	0.282987	8.52979e-06	0.00170871	8.73504e-06	0.282962	23.8258	1.62064	382.412
D7-1-30-05	749.6	10.18	0.282539	8.72226e-06	0.000603571	1.18613e-06	0.282531	8.03346	1.86694	997.662
D7-1-30-06	761.2	10.59	0.282554	8.13025e-06	0.00268917	6.21398e-06	0.282516	7.75604	1.68668	1033.51
D7-1-30-08	845.3	10.49	0.282559	8.70423e-06	0.00233316	1.56779e-05	0.282522	9.84406	1.04552	1016.7
D7-1-30-09	786.5	10.14	0.282544	9.15593e-06	0.0021801	1.99586e-05	0.282512	8.1764	1.84793	1034.06
D7-1-24-01	522.568	8.05349	0.282431	1.4926e-05	0.00123935	2.3682e-05	0.282419	-0.961441	1.05691	1166.95
D7-1-24-02	2521.91	43.055	0.281279	2.15573e-05	0.000934979	8.38752e-06	0.281234	2.21812	1.53298	2746.4
D7-1-24-05	2505.86	32.72	0.281094	1.89313e-05	0.00117725	1.2689e-05	0.281038	-5.1136	1.34602	3015.25
D7-1-24-06	2502.78	36.73	0.281265	2.04595e-05	0.00099851	1.37189e-05	0.281217	1.17001	1.45523	2770.46
D7-1-24-07	2588.89	39.3525	0.281301	1.67836e-05	0.00151283	8.48584e-06	0.281226	3.48272	1.19366	2758.21
D7-1-24-08	2546.29	48.7625	0.281302	1.62894e-05	0.00122233	2.77358e-05	0.281243	3.09404	1.15856	2735.32
D7-1-24-09	2164.81	35.495	0.281483	1.90908e-05	0.00127055	8.30633e-06	0.28143	0.985103	1.3563	2490.51
D7-1-24-10	526.777	5.95253	0.282581	1.63088e-05	0.000990624	2.03218e-05	0.282571	4.5094	1.15484	949.358
D7-1-24-11	516.808	4.70512	0.282644	1.67429e-05	0.00188938	1.97845e-05	0.282625	6.19883	1.18554	882.42
D7-1-24-14	2476.23	44.6	0.281315	1.98678e-05	0.00188933	4.38065e-05	0.878404	1.41336	1.41336	2765.75
D7-1-24-15	2216.97	42.2825	0.281433	1.77583e-05	0.000866373	6.85591e-06	0.976582	1.26213	1.26213	2532.01
D7-1-24-17	2523.76	38.89	0.281316	2.97644e-05	0.0014661	1.4563e-05	2.67047	2.11736	2.11736	2733.68
D7-1-24-18	2478.7	38.58	0.281265	1.95963e-05	0.00115469	1.60155e-05	0.396926	1.3933	1.3933	2780.66
D7-1-24-19	2460.8	44.9075	0.281282	1.9011e-05	0.00108502	2.3137e-05	0.714596	1.35249	1.35249	2752.6
D7-1-24-20	869.426	11.6075	0.282101	1.81283e-05	0.00209332	2.09347e-05	0.282067	-5.72498	1.28466	1668.27
D7-1-24-22	992.105	12.1934	0.282184	2.16593e-05	0.000702795	2.38557e-06	0.282171	0.693608	1.5353	1493.56
D7-1-24-23	1838.89	56.48	0.281591	2.34195e-05	0.000590297	1.24165e-05	0.281572	-1.48033	1.66277	2299.64
D7-1-24-24	325.548	5.0046	0.282795	1.68225e-05	0.00180411	8.58415e-06	0.282784	7.58051	1.19068	662.127
D7-1-24-25	2101.9	46	0.281516	1.89127e-05	0.000934114	9.1386e-06	0.28148	1.26017	1.3437	2423.16
D7-1-24-26	135.566	1.58233	0.282597	2.57091e-05	0.00121023	1.51828e-05	0.282594	-3.33476	1.8189	932.789
D7-1-24-27	268.717	3.68696	0.282733	2.55009e-05	0.00346512	3.60301e-05	0.282716	3.92228	1.8047	786.41
D7-1-24-28	650.958	7.35179	0.282657	2.70775e-05	0.00281038	3.49662e-05	0.282622	9.07282	1.9179	885.702
D7-1-24-29	2487.03	34.415	0.281272	2.04176e-05	0.00109215	2.5857e-05	0.281226	0.925673	1.45122	2767.02
D7-1-24-33	583.893	6.30324	0.282627	3.478e-05	0.00159954	1.94476e-05	0.28261	7.13556	2.46311	898.96
D7-1-24-37	271.437	2.8147	0.282715	2.09286e-05	0.00107239	1.81853e-05	0.282709	3.75666	1.48113	762.318
D7-1-24-47	2508.95	46.2975	0.281223	4.83683e-05	0.00194476	1.90992e-05	0.281135	-1.77837	3.43928	2898.18
D7-1-24-51	2473.76	63.73	0.281323	2.61591e-05	0.00137496	2.17199e-05	0.281255	1.95704	1.86091	2717.94
D7-1-24-56	2325.01	76.85	0.281124	1.32468e-05	0.000999959	3.11456e-06	0.281076	-7.81644	0.942182	2961.85
D7-1-24-57	2520.68	36.885	0.281312	2.90228e-05	0.00150903	5.25853e-05	0.281239	2.36819	2.06444	2743.01
D7-1-24-61	2282.41	96.4525	0.281313	2.50594e-05	0.00222048	4.72628e-05	0.281228	-3.93069	1.78039	2793.82
D7-1-24-71	741.474	7.20006	0.282724	2.97986e-05	0.00273298	5.35926e-05	0.282686	13.3485	2.11106	783.926
D7-1-24-78	2338.89	106.172	0.28123	3.19596e-05	0.00119666	3.76024e-05	0.281176	-4.0242	2.27259	2831.53
D7-1-24-84	2520.37	43.8275	0.281287	3.41678e-05	0.00137753	2.98853e-05	0.281222	1.7277	2.43025	2766.71
D7-1-42-02	2139.2	41.2025	0.281464	1.56558e-05	0.000681998	9.9773e-06	0.281434	0.595808	1.11299	2478.35
D7-1-42-03	124.623	3.31528	0.282527	1.45936e-05	0.00164505	4.31037e-06	0.282523	-6.05908	1.03246	1043.08
D7-1-42-05	2543.51	36.1125	0.281102	1.34245e-05	0.000467633	2.52844e-06	0.281078	-2.79159	0.955136	2950.77
D7-1-42-06	848.987	9.14014	0.281388	1.60254e-05	0.00134456	1.0073e-05	0.281366	-31.0109	1.13558	2626.28
D7-1-42-11	714.959	9.31991	0.282119	2.62839e-05	0.00167372	1.84389e-05	0.282096	-8.13947	1.86195	1625.19
D7-1-42-14	776.411	10.7839	0.282581	1.50237e-05	0.000745953	1.5559e-05	0.28257	10.0185	1.06443	943.362
D7-1-42-16	1987.96	43.67	0.281624	1.66768e-05	0.00319652	3.8247e-05	0.28149	-0.48617	1.18534	2418.8
D7-1-42-18	795.803	13.0584	0.282089	1.64868e-05	0.00138873	2.55956e-05	0.282069	-7.31631	1.16814	1653.92
D7-1-42-19	732.986	7.87209	0.282062	2.99909e-05	0.00217974	2.54031e-05	0.282032	-10.0189	2.12464	1728.99
D7-1-42-25	244.879	3.21123	0.282588	1.99827e-05	0.00121845	1.82306e-05	0.282583	-1.31088	1.41411	944.686
footnotes: Lu-Hf isotopic calculation method was taken from Shao (et al., 2015)
eHf(T) = [176Hf/177HfZ/176Hf/177HfCHUR(T) -1]´10000;
176Hf/177HfCHUR(T) = 176Hf/177HfCHUR(0) - 176Lu/177HfCHUR´(elT -1)
TDM = (1/l)´ln[1 + (176Hf/177HfDM - 176Hf/177HfZ)/(176Lu/177HfDM – 176Lu/177HfZ)];
TDMC = TDM – (TDM – T) ´[(fC – fZ)/( fC – fDM)];
fLu/Hf = 176Hf/177Hf/176Lu/177HfCHUR -1,
where fC, fZ, fDM are the fLu/Hf values of the continental crust, zircon sample, the depleted mantle; subscript Z = analyzed zircon sample, CHUR = chondritic uniform reservoir; DM = depleted mantle.
T = zircon age; l = 1.867´10-11 year-1, decay constant of 176Lu (Scherer et al., 2001); 176Hf/177HfDM = 0.28325, 176Lu/177HfDM = 0.0384 (Griffin et al., 2000);
present-day 176Hf/177HfCHUR(0) = 0.282772; 176Lu/177HfCHUR = 0.0332 (Blichert-Toft and Albarede, 1997)
References:
Blichert-Toft, J., and Albarède, F., 1997, The Lu-Hf isotope geochemistry of chondrites and the evolution of the mantle-crust system: Earth and Planetary Science Letters, v. 148, no. 1, p. 243-258, doi:https://doi.org/10.1016/S0012-821X(97)00040-X.
Griffin, W. L., Pearson, N. J., Belousova, E., Jackson, S. E., van Achterbergh, E., O’Reilly, S. Y., and Shee, S. R., 2000, The Hf isotope composition of cratonic mantle: LA-MC-ICPMS analysis of zircon megacrysts in kimberlites: Geochimica Et Cosmochimica Acta, v. 64, no. 1, p. 133-147, doi:https://doi.org/10.1016/S0016-7037(99)00343-9.
Scherer, E., Münker, C., and Mezger, K., 2001, Calibration of the Lutetium-Hafnium Clock: Science, v. 293, no. 5530, p. 683-687, doi:10.1126/science.1061372.
Shao, W.-Y., Chung, S.-L., Chen, W.-S., Lee, H.-Y., and Xie, L.-W., 2015, Old continental zircons from a young oceanic arc, eastern Taiwan: Implications for Luzon subduction initiation and Asian accretionary orogeny: Geology, v. 43, no. 6, p. 479-482, doi:10.1130/G36499.1.

## Sheet: Table DR5
Table DR5. Input parameters of numerical modelling for the contribution of slab-derived components to the GR lavas
End-members	Data sources	Nd (ppm)	Sr	Pb	87Sr/86Sr	143Nd/144Nd	206Pb/204Pb
Mantle source	Ishizuka et al. (2003)	1.74	23.8	0.144	0.7029	0.51307	17.85
Altered oceanic crust (AOC)	Hauff et al. (2003) Kelley et al.(2003)	15	108	0.132	0.704259	0.512941	19.363
Subducted sediment	Plank and Langmuir (1998)	93.9	160	20	0.709	0.51238	18.77
AOC ﬂuid:
Garnet/ﬂuid partition coefﬁcients	Brenan et al. (1995a, 1995b)	14.3	0.00076	0.028
Clinopyroxene/ﬂuid partition coefﬁcients	Brenan et al. (1995a, 1995b)	92.6	2.2	0.115
Bulk partition coefﬁcients (DAOC/ﬂuid)		45.62	0.880456	0.0628
2% Rayleigh distillation		0.335363	122.332	1.61876	0.704259	0.512941	19.363
Subducted sediment ﬂuid:
Bulk partition coefﬁcients (DSediment/ﬂuid)	Johnson and Plank (1999)	1.44	0.91	0.94
2% Rayleigh distillation		65.6093	175.477	21.2495	0.709	0.51238	18.77
*footnotes: Data source of other plotted samples and symbols in Fig.3 are listed here.
Mesozoic Pacific MORBs (Hauff et al., 2003; Kelly et al., 2003);
Huatung Basin igneous rocks (Hickey-Vargas et al., 2008);
OIB and primitive mantle (Sun and McDonough, 1989);
global subducting sediment (Plank and Langmuir, 1998);
the mantle array (Vervoort et al., 1999);
Luzon, Ryukyu, and Mariana Arc igneous rocks, West Philippine Basin lavas, Indian and Pacific-MORB, Shikoku, Parece Vela backarc basins lavas, Mariana trough lavas and South China Sea MORB from the GEOROC (http://georoc.mpch-mainz.gwdg.de/georoc/).
References
Brenan, J., Shaw, H., and Ryerson, F., 1995a, Experimental evidence for the origin of lead enrichment in convergent-margin magmas: Nature, v. 378, p. 54-56, doi:10.1038/378054a0.
Brenan, J. M., Shaw, H. F., Ryerson, F. J., and Phinney, D. L., 1995b, Mineral-aqueous fluid partitioning of trace elements at 900°C and 2.0 GPa: Constraints on the trace element chemistry of mantle and deep crustal fluids: Geochimica Et Cosmochimica Acta, v. 59, no. 16, p. 3331-3350, doi:https://doi.org/10.1016/0016-7037(95)00215-L.
Hauff, F. , Hoernle, K. , Schmidt, A. 2003, Sr-Nd-Pb composition of mesozoic pacific oceanic crust (site 1149 and 801, odp leg 185): implications for alteration of ocean crust and the input into the izu-bonin-mariana subduction system. Geochemistry Geophysics Geosystems, 4(8), doi:10.1029/2002GC000421.
Hickey-Vargas, R., Bizimis, M., and Deschamps, A., 2008, Onset of the Indian Ocean isotopic signature in the Philippine Sea Plate: Hf and Pb isotope evidence from Early Cretaceous terranes: Earth and Planetary Science Letters, v. 268, no. 3, p. 255-267, doi:https://doi.org/10.1016/j.epsl.2008.01.003.
Ishizuka, O., Taylor, R. N., Milton, J. A., and Nesbitt, R. W., 2003, Fluid–mantle interaction in an intra-oceanic arc: constraints from high-precision Pb isotopes: Earth and Planetary Science Letters, v. 211, no. 3, p. 221-236, doi:https://doi.org/10.1016/S0012-821X(03)00201-2.
Johnson, M., and Plank, T., 1999, Dehydration and melting experiments constrain the fate of subducted sediments: Geochemistry Geophysics Geosystems, v. 1, doi:10.1029/1999GC000014.
Kelley, K. A., Plank, T., Ludden, J., and Staudigel, H., 2003, Composition of altered oceanic crust at ODP Sites 801 and 1149: Geochemistry Geophysics Geosystems, v. 4, doi:Artn 891010.1029/2002gc000435.
Plank, T., and Langmuir, C. H., 1998, The chemical composition of subducting sediment and its consequences for the crust and mantle: Chemical Geology, v. 145, no. 3-4, p. 325-394, doi:Doi 10.1016/S0009-2541(97)00150-2.
Sun, S.-S., and McDonough, W. F., 1989, Chemical and isotopic systematics of oceanic basalts: implications for mantle composition and processes: Geological Society, London, Special Publications, v. 42, no. 1, p. 313-345, doi:10.1144/gsl.sp.1989.042.01.19.
Vervoort, J. D., Patchett, P. J., Blichert-Toft, J., and Albarède, F., 1999, Relationships between Lu–Hf and Sm–Nd isotopic systems in the global sedimentary system: Earth and Planetary Science Letters, v. 168, no. 1, p. 79-99, doi:https://doi.org/10.1016/S0012-821X(99)00047-3.

## Sheet: Table DR6
Table DR6. Trace element and isotope compositions of international standards
	AGV-2			BHVO-2			BCR-2
	This study	Ref.		This study	Ref.		This study	Ref.
Sc	13.0783	13		30.8476	32		31.1	33
V	117.451	122		310.762	317		398	416
Cr	14.9972	16		291.175	280		16.8	18
Co	15.4321	16		44.6499	45		35.4	37
Ni	18.5486	20		116.792	119		13.4	13
Cu	51.5265	53		131.669	127		22.2	21
Zn	88.6804	86		98.8808	103		130	127
Rb	66.0127	66.3		8.92808	9.11		48.4	46.9
Sr	650.357	661		394.454	396		345	340
Y	19.8972	19		27.2715	26		38.9	37
Zr	229.14	230		168.179	172		191	184
Nb	14.101	14.5		18.3858	18.1		12.1	12.6
Ba	1141.82	1130		130.169	131		685	677
La	38.4697	37.9		15.0453	15.2		25.5	24.9
Ce	71.7962	68.6		39.474	37.5		54.9	52.9
Pr	8.27668	7.84		5.45521	5.35		7.07	6.7
Nd	30.308	30.5		24.7836	24.5		30.4	28.7
Sm	5.4249	5.49		6.12038	6.07		6.71	6.58
Eu	1.43077	1.53		2.00751	2.07		1.89	1.96
Gd	4.38722	4.52		6.19959	6.24		6.58	6.75
Tb	0.630759	0.64		0.958207	0.92		1.12	1.07
Dy	3.4809	3.47		5.37795	5.31		6.67	6.41
Ho	0.600649	0.65		0.983875	0.98		1.09	1.28
Er	1.84991	1.81		2.59923	2.54		3.79	3.66
Tm	0.264179	0.26		0.321398	0.33		0.51	0.54
Yb	1.63235	1.62		2.04731	2		3.35	3.38
Lu	0.239323	0.25		0.283387	0.27		0.51	0.5
Hf	5.22165	5		4.47406	4.36		4.97	4.9
Ta	0.845597	0.87		1.23238	1.14		0.79	0.74
Pb	12.3691	13.2		1.50875	1.6		10.4	11
Th	6.24266	6.1		1.20715	1.22		6.05	5.7
U	1.75108	1.86		0.423561	0.4		1.81	1.69
Note: Reference data for AGV-2, BHVO-2, and BCR-2 are taken from GeoReM (http://georem.mpch-mainz.gwdg.de) and Jochum et al. (2016).
Sample No.	Rock type	87Sr/86Sr	2SE	143Nd/144Nd	2SE			Data source
W-2	diabase	0.707007	1.04274e-05	0.512523	8.43184e-06			This study
W-2	diabase	0.706996	1.26512e-05	0.512526	9.56214e-06			This study
W-2 Ref.		0.706977	1.6e-05	0.512531	1.3e-05			Fourny et al. (2016)
BHVO-2	basalt	0.703469	1.06e-05	0.512985	8.43486e-06			This study
BHVO-2	basalt	0.703478	1.01652e-05	0.512995	7.23678e-06			This study
BHVO-2 Ref.		0.703478	2e-05	0.512979	1.4e-05			GeoReM; Jochum et al. (2016)
Pb isotopes
Sample No.	Rock type	206Pb/204Pb	2SE		2SE	208Pb/204Pb	2SE	Data source
W-2	diabase	18.7546	0.000884	15.6636	0.000852	38.6421	0.00244	This study
W-2	diabase	18.7515	0.00091	15.6623	0.00083	38.6261	0.00238	This study
W-2 Ref.		18.7497	0.0045	15.6623	0.003	38.6321	0.0089	Fourny et al. (2016)
BHVO-2	basalt	18.7128	0.00219565	15.5412	0.00254265	38.4201	0.00712475	This study
BHVO-2	basalt	18.7319	0.00254321	15.5829	0.00231463	38.4125	0.00912643	This study
BHVO-2 Ref.		18.634	0.028	15.524	0.0025	38.146	0.0372	GeoReM; Jochum et al. (2016)
Hf isotopes
Sample No.	Rock type	176Hf/177Hf	2SE					Data source
BCR-2	basalt	0.282861	7.525e-06					This study
BCR-2 Ref.		0.282865	1.3e-05					GeoReM; Jochum et al. (2005)
BHVO-2	basalt	0.283092	1.72134e-06					This study
BHVO-2 Ref.		0.283082	0.000133					GeoReM; Jochum et al. (2016)
Refrecenes
Fourny, A., Weis, D., and Scoates, J. S., 2016, Comprehensive Pb-Sr-Nd-Hf isotopic, trace element, and mineralogical characterization of mafic to ultramafic rock reference materials: Geochemistry, Geophysics, Geosystems, v. 17, no. 3, p. 739-773, doi:https://doi.org/10.1002/2015GC006181.
Jochum, K. P., Nohl, U., Herwig, K., Lammel, E., Stoll, B., and Hofmann, A. W., 2005, GeoReM: A New Geochemical Database for Reference Materials and Isotopic Standards: Geostandards and Geoanalytical Research, v. 29, no. 3, p. 333-338, doi:https://doi.org/10.1111/j.1751-908X.2005.tb00904.x.
Jochum, K. P., Weis, U., Schwager, B., Stoll, B., Wilson, S. A., Haug, G. H., Andreae, M. O., and Enzweiler, J., 2016, Reference Values Following ISO Guidelines for Frequently Requested Rock Reference Materials: Geostandards and Geoanalytical Research, v. 40, no. 3, p. 333-350, doi:https://doi.org/10.1111/j.1751-908X.2015.00392.x.

## Sheet: Table DR7
Table DR7. Ages and trace element (ppm) compositions of Zircon standards
Standards	Pb	Th	U	Pb	207Pb/206Pb	207Pb/206Pb	207Pb/235U	207Pb/235U	206Pb/238U	206Pb/238U		208Pb/232Th	208Pb/232Th	208Pb/232Th		207Pb/206Pb	207Pb/206Pb	207Pb/235U	207Pb/235U	206Pb/238U	206Pb/238U	208Pb/232Th	208Pb/232Th	208Pb/232Th
	Total	232	238	Common Pb	Ratio	1sigma	Ratio	1sigma	Ratio	1sigma	rho	Ratio	1sigma	Ratio		Age (Ma)	1sigma	Age (Ma)	1sigma	Age (Ma)	1sigma	Age (Ma)	1sigma		Concordance
	ppm	ppm	ppm	ppm
GJ-1	32.175	9.56508	307.807	0	0.0582948	0.00231953	0.789726	0.0313932	0.0977459	0.00112723	0.290105	0.0296733	0.00217356	32.6579	1	542.63	91.6525	591.017	17.8151	601.185	6.62752	591.037	42.6665	1	98%
GJ-1	32.5192	9.68847	313.116	1.24644	0.0589705	0.00205513	0.798596	0.028393	0.097568	0.0011469	0.330625	0.0308404	0.00257601	33.2706	1	564.85	75.9125	596.036	16.0342	600.141	6.74398	613.934	50.5091	1	99%
GJ-1	31.4712	9.2651	290.774	0.754064	0.0596513	0.0021854	0.80271	0.0288916	0.097683	0.00109771	0.312218	0.031905	0.00216594	34.2656	1	590.77	112.02	598.356	16.2784	600.816	6.45476	634.797	42.4248	1	99%
GJ-1	30.8216	8.8707	283.062	0	0.0593952	0.00207925	0.803386	0.0277681	0.0982697	0.00119176	0.350871	0.0306439	0.00206596	34.9643	1	583.36	77.765	598.737	15.6399	604.261	7.00278	610.081	40.5161	1	99%
GJ-1	31.4366	9.45175	297.867	1.90015	0.060688	0.00217895	0.822236	0.0284257	0.0980219	0.00130564	0.385287	0.0346274	0.00246503	34.8269	1	627.795	77.765	609.295	15.8447	602.806	7.67222	688.051	48.1561	1	98%
GJ-1	30.7788	9.03723	293.241	0.0115337	0.0605827	0.00204154	0.821267	0.0268535	0.0978431	0.00115779	0.361894	0.0306544	0.00212988	36.0178	1	633.35	72.21	608.755	14.977	601.756	6.80615	610.287	41.7692	1	98%
GJ-1	31.2516	9.34061	292.564	1.25213	0.058105	0.00205342	0.789283	0.0284648	0.0979199	0.00102033	0.288932	0.0294511	0.00209757	34.2273	1	600.025	77.765	590.765	16.1582	602.207	5.99968	586.675	41.1836	1	98%
GJ-1	30.56	9.11546	285.935	0	0.0577858	0.00184735	0.786298	0.0247014	0.0982281	0.00107293	0.347698	0.0356902	0.00212013	34.2602	1	520.41	70.3625	589.07	14.0467	604.017	6.30637	708.804	41.3759	1	97%
GJ-1	32.6602	9.59308	313.78	0	0.0606231	0.00226175	0.821045	0.0304563	0.0976659	0.00102534	0.283019	0.0278791	0.0016336	35.4725	1	625.63	81.4675	608.631	16.9869	600.715	6.03039	555.787	32.1232	1	98%
GJ-1	31.5705	9.32467	305.275	1.0771	0.0592142	0.00216838	0.799743	0.0292384	0.097551	0.00109178	0.306126	0.0292503	0.00174184	35.95	1	575.96	79.6175	596.684	16.5008	600.041	6.4207	582.732	34.206	1	99%
GJ-1	30.9013	8.65577	286.763	1.19473	0.0588372	0.00224471	0.795276	0.0299532	0.0978198	0.000976904	0.265155	0.0331818	0.0019659	36.0723	1	561.145	83.32	594.161	16.9459	601.62	5.74559	659.791	38.4592	1	98%
GJ-1	29.1211	8.24951	273.79	0.246426	0.0614377	0.00209447	0.833743	0.0275888	0.0979235	0.00110403	0.340717	0.0304052	0.00235493	36.3105	1	653.72	69.435	615.687	15.2822	602.228	6.49041	605.4	46.1939	1	97%
GJ-1	30.3809	8.6331	287.375	0.513421	0.0606575	0.00217325	0.821189	0.0289545	0.0975784	0.00105741	0.307337	0.0276825	0.00181208	36.8807	1	627.795	77.765	608.712	16.1486	600.202	6.21893	551.921	35.6395	1	98%
PLE	37.6822	67.4854	651.778	0	0.0554047	0.00219462	0.406652	0.0155897	0.0530033	0.000612346	0.301355	0.0153015	0.000816389	9.98704	1	427.825	91.6575	346.461	11.2558	332.934	3.75305	306.936	16.2524	1	96%
PLE	34.0825	56.1059	585.321	0.164913	0.0526812	0.00208565	0.393305	0.015758	0.053837	0.000728535	0.337753	0.0174804	0.000754209	10.8984	1	322.28	116.655	336.781	11.486	338.036	4.46025	350.265	14.9823	1	99%
PLE	32.0553	50.7582	532.878	0	0.0526031	0.00180689	0.390725	0.0132528	0.0538752	0.000593346	0.324701	0.0166798	0.00071928	11.3275	1	322.28	77.77	334.899	9.67867	338.27	3.63401	334.354	14.2997	1	98%
PLE	31.9208	50.7498	534.587	0	0.0490854	0.00176233	0.361214	0.0127148	0.0534478	0.000574808	0.305526	0.018087	0.000731228	11.3847	1	150.085	85.17	313.121	9.48685	335.654	3.52212	362.312	14.5172	1	93%
PLE	34.8604	57.4348	595.937	0	0.0537142	0.00191362	0.401665	0.0141122	0.0537315	0.000528201	0.279796	0.0170607	0.000700689	11.4187	1	366.72	81.4725	342.855	10.2257	337.39	3.23651	341.927	13.9249	1	98%
PLE	36.5213	65.8915	619.862	1.66053	0.0552595	0.00183787	0.414463	0.0136445	0.0538788	0.000556543	0.313769	0.0164795	0.00059575	10.3313	1	433.38	74.0675	352.084	9.7977	338.292	3.40918	330.372	11.8462	1	96%
PLE	36.4355	59.7068	613.824	0	0.0519672	0.00170502	0.385807	0.0126059	0.0535177	0.0005495	0.314244	0.0178013	0.00069031	11.144	1	283.395	80.545	331.302	9.23911	336.082	3.36726	356.64	13.7087	1	98%
PLE	35.687	58.2433	603.827	0	0.0524999	0.00170291	0.389023	0.0124891	0.0534929	0.000542197	0.315723	0.0164911	0.000582798	11.2237	1	305.615	78.695	333.655	9.13239	335.93	3.32271	330.602	11.5885	1	99%
Standards	SiO2	P	Ti	Y	Nb	La	Ce	Pr	Nd	Sm	Eu	Gd	Tb	Dy	Ho	Er	Tm	Yb	Lu	Hf	Ta	Hg	Pb	Pb	Th	U
	29	31	49	89	93	139	140	141	146	147	153	157	159	163	165	166	169	172	175	178	181	202	Common Pb	Total	232	238
	wt%	ppm	ppm	ppm	ppm	ppm	ppm	ppm	ppm	ppm	ppm	ppm	ppm	ppm	ppm	ppm	ppm	ppm	ppm	ppm	ppm	ppm	ppm	ppm	ppm	ppm
GJ-1	32.7469	117.7	3.8951	221.114	1.21942	0.0138938	13.747	0.02101	0.502358	1.46372	0.951121	6.64766	1.83066	17.91	6.50217	27.9803	6.0023	56.5544	12.6126	7122.34	0.313315	0	0	32.175	9.56508	307.807
GJ-1	32.7469	60.3192	1.6657	227.843	1.12554	0	13.9078	0.0370556	0.469064	1.29117	0.85934	6.90953	1.8027	18.9076	6.48347	27.8017	5.86091	56.9775	12.9711	7258.65	0.369568	0	1.24644	32.5192	9.68847	313.116
GJ-1	32.7469	85.0324	2.34891	226.446	1.3041	0.00615104	14.3084	0.0229236	0.412384	1.18846	0.838131	5.90341	1.79062	18.2793	6.61222	27.6977	5.64591	56.9968	12.5523	7152.99	0.412777	0	0.754064	31.4712	9.2651	290.774
GJ-1	32.7469	109.397	2.65698	222.533	1.21447	0	13.1801	0.0283209	0.398026	1.26459	0.726047	6.50728	1.67049	17.6557	6.16239	26.4641	5.65708	51.9514	12.0478	6938.47	0.435829	0	0	30.8216	8.8707	283.062
GJ-1	32.7469	183.384	2.65242	231.304	1.05359	0	13.9872	0.0184398	0.504472	1.00659	0.718012	6.04199	1.83801	17.4263	6.56494	27.8186	5.74599	57.9145	12.398	7096.68	0.387505	0	1.90015	31.4366	9.45175	297.867
GJ-1	32.7469	165.547	1.44093	222.986	1.10446	0.0119771	13.6253	0.0398897	0.527227	1.11456	0.871088	5.74564	1.72746	18.1642	6.55481	25.3548	5.59367	54.8188	12.1546	6908.66	0.402774	0	0.0115337	30.7788	9.03723	293.241
GJ-1	32.7469	70.8808	3.14249	225.941	1.29224	0	13.6538	0.0335326	0.495534	1.4481	0.954687	6.46858	1.82525	19.0528	6.40599	27.4243	5.7291	56.1792	12.2953	7031.05	0.383532	0	1.25213	31.2516	9.34061	292.564
GJ-1	32.7469	101.862	3.52662	220.768	1.2372	0	12.7648	0.0140918	0.394026	1.42014	0.910085	6.48252	1.83242	18.898	6.11887	27.3824	5.84256	54.9793	12.0044	6969.63	0.361475	0	0	30.56	9.11546	285.935
GJ-1	32.7313	119.506	4.06316	229.997	1.47527	0	14.8348	0.0197795	0.503772	0.984472	0.971142	7.09763	1.84611	19.2055	6.76216	28.0901	5.84187	58.9735	12.8693	7379.78	0.368146	0	0	32.6602	9.59308	313.78
GJ-1	32.7313	93.6955	2.53781	232.831	1.44427	0	14.4213	0.0224802	0.437316	1.56665	0.960835	5.8621	1.88459	19.5127	6.71774	28.4425	5.85438	57.3462	12.6461	7341.02	0.412916	0	1.0771	31.5705	9.32467	305.275
GJ-1	32.7313	126.707	1.84371	224.108	1.26685	0	13.9728	0	0.415359	1.10976	0.745297	6.47761	1.64142	18.1604	6.21962	27.9533	6.13564	52.969	11.8941	6871.26	0.42482	0	1.19473	30.9013	8.65577	286.763
GJ-1	32.7313	75.5159	3.86101	216.011	1.24363	0	12.8234	0.0072917	0.475746	1.22613	0.747375	5.6539	1.67242	17.464	6.15347	24.8773	5.5782	52.8706	11.4025	6693.23	0.400284	0	0.246426	29.1211	8.24951	273.79
GJ-1	32.7313	51.1485	3.4636	225.586	1.30864	0	13.6424	0.0241972	0.417737	1.28844	1.02744	6.31452	1.75087	18.6198	6.39892	27.3041	5.90381	56.2033	12.2791	7017.68	0.411488	0	0.513421	30.3809	8.6331	287.375
PLE	32.7313	503.143	49.9876	374.763	4.49743	0	1.85266	0.107521	1.70796	2.99394	0.673875	9.6998	3.74606	41.8235	11.7844	39.561	6.90539	48.4497	6.68309	11840.6	2.47897	0	0	37.6822	67.4854	651.778
PLE	32.7313	448.819	56.2933	340.907	4.24714	0.00577504	1.84195	0.0480076	1.2522	2.51946	0.577273	9.83424	3.42918	35.9654	10.7886	36.4505	6.2569	47.604	6.9167	12043.5	2.35272	0	0.164913	34.0825	56.1059	585.321
PLE	32.7313	425.013	54.2414	338.468	3.40288	0.00616816	1.64481	0.0690927	1.06009	2.01627	0.577423	7.55907	3.27	35.7726	10.0289	36.9241	6.17233	43.4947	6.28054	11369	2.10624	0	0	32.0553	50.7582	532.878
PLE	32.7313	468.235	49.5177	342.338	3.69623	0.0180891	1.68743	0.0584365	1.41989	1.70247	0.564394	8.34563	3.22078	37.3256	10.5516	38.1689	6.75475	45.4528	6.7996	11577.8	2.12412	0	0	31.9208	50.7498	534.587
PLE	32.7313	483.059	56.8032	416.863	3.88777	0.011819	1.72013	0.144331	1.30984	2.95693	0.632495	10.8814	4.02245	44.1665	12.8039	44.7082	7.4845	54.0289	7.64862	11409.6	2.23874	0	0	34.8604	57.4348	595.937
PLE	32.7313	515.862	63.5269	399.974	4.83695	0.0112796	1.94045	0.0834805	1.27407	2.92876	0.866708	10.9887	4.10908	42.8162	12.5337	43.6809	7.4985	52.2662	7.47075	11177.1	2.20791	0	1.66053	36.5213	65.8915	619.862
PLE	32.7313	540.687	61.6872	465.54	3.33524	0.0122016	1.7064	0.14894	1.58225	3.30384	0.83292	12.1106	4.76387	52.2561	14.1282	52.4088	8.72062	60.1493	8.79962	11591.4	2.15762	0	0	36.4355	59.7068	613.824
PLE	32.7313	499.786	63.5458	456.592	3.63964	0	1.6639	0.141094	1.83099	2.9042	0.814717	11.8853	4.54344	49.521	14.2283	49.4927	8.60734	61.4988	8.60605	11825.1	2.23246	0	0	35.687	58.2433	603.827

## Sheet: Table DR8
TableDR8. Hf isotope compositions of Zircon standards
Standards	176Hf/177Hf	1σ	176Lu/177Hf	1σ	176Yb/177Hf	1σ
91500	0.282314	1.70129e-05	0.000322549	3.50115e-07	0.00991363	6.09921e-05
91500	0.282307	1.49823e-05	0.000318552	2.31338e-07	0.00971703	5.35957e-05
91500	0.282312	1.66062e-05	0.000320425	2.29486e-07	0.00987844	4.57969e-05
91500	0.28231	1.61718e-05	0.000320769	2.70624e-07	0.0098657	4.25265e-05
91500	0.28229	1.69086e-05	0.000320451	3.45087e-07	0.00983344	4.55168e-05
91500	0.282331	1.67035e-05	0.000319322	2.26142e-07	0.00977945	4.57758e-05
91500	0.282302	1.65395e-05	0.00032161	2.95736e-07	0.0097726	3.75725e-05
91500	0.28232	1.86538e-05	0.000330568	2.64681e-07	0.0100766	3.91965e-05
91500	0.282309	1.47574e-05	0.000327806	3.63422e-07	0.0100004	4.39168e-05
91500	0.282313	1.52326e-05	0.000324256	3.12576e-07	0.00983089	4.19669e-05
91500	0.282318	1.64843e-05	0.00032134	2.98048e-07	0.00970305	4.01678e-05
91500	0.282304	1.66715e-05	0.000325726	2.19691e-07	0.00999048	4.45966e-05
91500	0.282311	1.78462e-05	0.000323228	2.55784e-07	0.00999956	4.88871e-05
91500	0.28231	1.63889e-05	0.000323075	2.29092e-07	0.00992965	4.65685e-05
91500	0.282317	1.5884e-05	0.000327305	2.50053e-07	0.0101643	5.19978e-05
91500	0.282305	1.58177e-05	0.00033185	2.43271e-07	0.0103622	5.07903e-05
GJ-1	0.282011	1.51829e-05	0.000258908	1.85476e-07	0.00761902	2.93725e-05
GJ-1	0.282025	1.54183e-05	0.000259632	1.97525e-07	0.00762178	2.79513e-05
GJ-1	0.282014	1.56012e-05	0.000257138	2.25504e-07	0.00761764	3.60803e-05
GJ-1	0.282006	1.43713e-05	0.000256568	2.22691e-07	0.00763758	4.0134e-05

## Sheet: Table DR9
Table DR9. Ar-Ar dating data for plagiolcase in the GR lavas
Incremental Heating			36Ar(a) [fA]	37Ar(ca) [fA]	38Ar(cl) [fA]	39Ar(k) [fA]	40Ar(r) [fA]	Age	± 2s	40Ar(r)	39Ar(k)	K/Ca	± 2s
								(Ma)		(%)	(%)
Sample = D7-1-25, Material = Plagioclase, J-value = 0.00165315 ± 0.00000101
21G05780	0.8		0.0695984	11.1726	0.00694546	1.03747	40.6745	114.953	2.78501	67.1546	1.46949	0.0399291	0.000723504
21G05782	1		0.0290483	11.8563	0	0.923329	38.0098	120.516	2.54718	82.0712	1.30782	0.0334869	0.000634277
21G05783	1.2		0.0228239	13.5921	0	0.976398	40.6422	121.814	2.63688	86.1674	1.38299	0.0308893	0.000622565
21G05785	1.4		0.0213147	15.459	0.00670827	1.06199	44.0604	121.429	2.14423	87.8512	1.50422	0.0295397	0.000472772
21G05786	1.6		0.0113884	10.7824	0	0.714704	30.0105	122.849	3.28247	90.2135	1.01232	0.0285021	0.000709717
21G05788	1.8	4	0.015192	14.7655	0	0.960056	40.5527	123.556	2.52262	90.3267	1.35984	0.0279587	0.000534544
21G05789	2	4	0.0170097	14.4384	0	0.923536	38.8295	123.002	2.66528	88.8711	1.30812	0.0275045	0.000556318
21G05791	2.2	4	0.0151321	13.4862	0	0.841366	36.2944	126.093	2.94741	89.3508	1.19173	0.0268266	0.000588761
21G05792	2.4	4	0.0786023	26.8583	0.000237396	1.68095	71.0806	123.686	1.81343	75.9826	2.38093	0.0269119	0.000292067
21G05794	2.6	4	0.0541373	28.5414	0	1.74037	74.4465	125.072	1.6371	82.7904	2.4651	0.0262201	0.000295701
21G05795	2.8	4	0.0259805	18.8236	0.00163387	1.15563	48.6286	123.103	2.13641	86.7511	1.63686	0.0263989	0.000419227
21G05797	3	4	0.0673386	31.3449	0	1.92585	81.4961	123.773	1.53549	80.8937	2.72782	0.0264195	0.000265049
21G05798	3.2	4	0.0992691	45.258	0	2.75488	116.905	124.109	1.28192	80.4683	3.90207	0.0261743	0.000202168
21G05800	3.5	4	0.0298246	28.3981	0	1.70842	72.8303	124.659	1.5176	89.5204	2.41984	0.0258686	0.000297843
21G05801	3.8	4	0.0738681	43.8755	0	2.66093	112.967	124.16	1.18242	84.2519	3.769	0.0260784	0.000211127
21G05803	4.1	4	0.0930015	63.619	0	3.87455	164.107	123.881	0.894804	86.0587	5.488	0.026188	0.000163366
21G05804	4.4	4	0.0529355	52.8036	0	3.20723	135.724	123.777	0.86722	89.969	4.54279	0.0261177	0.000176094
21G05806	4.8	4	0.0322324	40.6181	0.000485738	2.46253	103.9	123.421	1.06367	91.8538	3.48798	0.0260694	0.00022128
21G05807	5.4	4	0.0376477	57.4299	0	3.46997	147.432	124.257	0.792183	93.1964	4.91494	0.025981	0.000175136
21G05809	6	4	0.078803	110.922	0	6.77444	285.947	123.47	0.490088	92.6969	9.59546	0.0262618	0.000125251
21G05810	7	4	0.0636041	112.351	0	6.88313	291.43	123.838	0.445142	94.1268	9.74941	0.0263438	0.000123668
21G05812	8	4	0.0129611	46.1831	0.000565372	2.80858	118.706	123.628	0.89841	96.9722	3.97813	0.02615	0.000201384
21G05813	9.5	4	0.112225	175.763	0	10.7701	458.488	124.49	0.376314	93.4599	15.255	0.0263488	0.000112594
21G05815	11	4	0.0165157	41.2207	0	2.50028	106.112	124.122	1.00812	95.7394	3.54145	0.0260821	0.000218393
21G05816	13	4	0.0194568	43.3941	0	2.68965	113.775	123.728	0.920704	95.3385	3.80967	0.0266522	0.000207245
21G05818	15	4	0.0117754	32.3788	0.00283414	1.94631	82.3355	123.735	1.23111	96.0714	2.75679	0.0258476	0.00025514
21G05819	17	4	0.0212788	35.6731	0	2.1478	91.1144	124.071	1.19138	93.7412	3.04219	0.0258894	0.000247104
Sample = D7-1-20, Material = Plagioclase, J-value = 0.00165514 ± 0.00000101
21G05731	0.8		0.039966	8.27564	0	1.1099	34.7063	92.3686	2.20707	75.4377	1.50464	0.0576699	0.000971512
21G05733	0.9		0.0179047	6.15586	0	0.721968	23.7133	96.9012	2.73969	82.4067	0.978739	0.050431	0.0012879
21G05734	1		0.0284915	8.29051	0	0.835308	29.8726	105.264	2.78984	78.7602	1.13239	0.0433245	0.000972156
21G05736	1.1		0.00932647	6.68378	0	0.628479	23.0234	107.754	3.15286	89.7226	0.852	0.0404331	0.00115709
21G05737	1.2		0.00633845	5.77987	0.00501097	0.53859	19.5985	107.054	3.71138	91.6208	0.730142	0.0400691	0.00137001
21G05739	1.4		0.0108578	9.582	0	0.827831	31.0064	110.099	2.62698	90.9899	1.12225	0.0371496	0.000867063
21G05740	1.6		0.0111296	15.8022	0	1.25958	49.1555	114.574	1.777	93.9823	1.70755	0.034275	0.000530368
21G05742	1.8		0.0139011	13.359	0.0105153	1.01973	40.275	115.912	2.13046	91.1078	1.3824	0.0328232	0.000580312
21G05743	2		0.00767304	13.6984	0	1.02127	40.7844	117.161	2.15012	94.9481	1.38449	0.0320581	0.000586823
21G05745	2.2		0.0172224	19.3585	0	1.39317	56.4196	118.758	1.70464	92.0539	1.88865	0.0309457	0.000432666
21G05746	2.4		0.0252277	23.4208	0.00334279	1.63829	66.9236	119.759	1.45791	90.3674	2.22095	0.0300785	0.000340045
21G05748	2.6		0.0313437	24.068	0	1.63757	67.3842	120.607	1.59503	88.3762	2.21998	0.0292569	0.000341761
21G05749	2.8		0.0218597	18.1348	0	1.21571	50.2973	121.242	1.9402	89.0557	1.64808	0.0288261	0.00043221
21G05751	3		0.0447983	28.5498	0.00180448	1.8848	78.4985	122.023	1.57545	86.1055	2.55513	0.0283877	0.000294268
21G05752	3.2		0.0253412	22.2798	0.0164909	1.46562	61.0267	121.997	1.70019	89.4921	1.98687	0.0282864	0.000365182
21G05754	3.5		0.0422004	28.8793	0	1.87163	78.1802	122.371	1.55991	86.7583	2.53729	0.0278677	0.000295397
21G05755	3.8	4	0.102252	50.9581	0	3.26604	137.996	123.732	1.50147	82.678	4.42762	0.0275599	0.000186592
21G05757	4.1	4	0.0692574	54.2526	0	3.42585	145.375	124.251	1.09399	88.1284	4.64427	0.0271529	0.000178098
21G05758	4.4	4	0.0423271	49.9639	0.0084443	3.1485	132.903	123.619	0.954437	91.7382	4.26827	0.0270966	0.00019279
21G05760	4.8	4	0.0504079	53.1487	0	3.34691	141.068	123.441	0.95106	90.823	4.53726	0.0270782	0.00018063
21G05761	5.4	4	0.0855876	92.7246	0	5.8549	248.067	124.065	0.74695	91.1111	7.93722	0.0271514	0.000133371
21G05763	6	4	0.135164	81.9033	0	5.1595	218.749	124.145	1.206	85.1272	6.9945	0.0270879	0.0001441
21G05764	7	4	0.062686	88.6183	0	5.61151	237.871	124.124	0.644901	93.0646	7.60727	0.0272286	0.000136586
21G05766	8	4	0.0668707	103.788	0	6.59109	279.204	124.042	0.564359	93.6567	8.93523	0.0273074	0.000127926
21G05767	9.5	4	0.0932611	121.876	0	7.74123	326.921	123.675	0.607195	92.5353	10.4944	0.0273124	0.000122936
21G05769	11	4	0.0450533	70.6282	0	4.49226	190.766	124.338	0.686725	93.7395	6.08994	0.0273499	0.000153399
21G05770	13	4	0.040142	62.9699	0	3.95804	168.53	124.66	0.75432	93.6893	5.36573	0.0270281	0.00016465
21G05772	15	4	0.0106492	17.8714	0	1.10377	46.8691	124.33	2.0313	93.9625	1.49633	0.0265577	0.000431756
21G05773	17	4	0.0103242	16.2419	0	0.996092	42.6736	125.401	2.30505	93.5965	1.35036	0.0263712	0.000480966
*footnotes: Constants Used in Calculations are listed here.
Age Equations = Min et al. (2000)
Collector Calibrations = 36Ar
Decay 40K = 5.463 ± 0.107 E-10 1/a
Decay 39Ar = 2.940 ± 0.016 E-07 1/h
Decay 37Ar = 8.230 ± 0.012 E-04 1/h
Decay 36Cl = 2.257 ± 0.015 E-06 1/a
Decay 40K(EC,β⁺) = 0.580 ± 0.014 E-10 1/a
Decay 40K(β⁻) = 4.884 ± 0.099 E-10 1/a
Atmospheric 40/36(a) = 282.73 ± 7.35
Atmospheric 38/36(a) = 0.1885 ± 0.0003
Production 39/37(ca) = 0.0006425 ± 0.0000059
Production 38/37(ca) = 0.0001800 ± 0.0000173
Production 36/37(ca) = 0.0002703 ± 0.0000005
Production 40/39(k) = 0.000607 ± 0.000059
Production 38/39(k) = 0.012077 ± 0.000011
Production 36/38(cl) = 262.80 ± 1.71
Scaling Ratio K/Ca = 0.430
Abundance Ratio 40K/K = 1.1700 ± 0.0100 E-04
Atomic Weight K = 39.0983 ± 0.0001 g
References:
Min, K., Mundil, R., Renne, P. R., and Ludwig, K. R., 2000, A test for systematic errors in 40Ar/39Ar geochronology through comparison with U/Pb analysis of a 1.1-Ga rhyolite: Geochimica Et Cosmochimica Acta, v. 64, no. 1, p. 73-98, doi:https://doi.org/10.1016/S0016-7037(99)00204-5.
